# Supplementary material for: miR-381-3p Inhibits Intramuscular Fat Deposition through Targeting FABP3 by ceRNA Regulatory Network
Source: Biology (Basel). 2022 Oct 13;11(10):1497. doi: 10.3390/biology11101497 (PMC9598794; doi:10.3390/biology11101497)
Supplement: Supplementary file 1 [file biology-11-01497-s001.zip › Supplementary Table.xlsx]

## Sheet: Table S1
Supplementary Table S1 Primers used for the quantitative real-time PCR analysis
Primer	Sequence (5’→3’)
WNT9A_L	GGCCTATTTTCCCCCAGAGG
WNT9A_R	ATCCCCAGACTCTCTCCACC
SPP1_L	AAGTTCCGCAGATCCGAAGC
SPP1_R	GCTGACTCGTCTCCTGACTG
ACP5_L	GGATGAGAATGGCTTGGGCT
ACP5_R	GCCTTGGCAACTTGGTCTTG
FABP3_F	GATGACAGGAAGGTCAAGTCCA
FABP3_R	TCTCGTAAGTGCGAGTGCAA
DLX5_F	TTACGCCGACTACAGCTACG
DLX5_R	TGCCGTTCACCATTCTCACC
XPNPEP2_F	CGAAAGCTGCCTTCAACTCG
XPNPEP2_R	CGTTTCTGAAGATCTGGAGAGTGA
DLGAP4_F	ATATCAAGGCCATGGGCGAC
DLGAP4_R	GGCCTGTCCAAAAATCTGGC
MLC1_F	GAAATGTCAGCGCGATTCCC
MLC1_R	GACTCGACCAGGAAATGCCA
PPARG_F	GTCTGCAAACATTTCACAAGAGGT
PPARG_R	ATCAGCTCTCGGGAATGGGA
CEBPA_F	GAGGACTCTAGCTCCCCCAT
CEBPA_R	ATGTCGATGGACGTCTCGTG
GAPDH_F	GCTGCAGCCTTCCCCTG
GAPDH_R	GATGCGGCCAAATCCGTTC
FABP4_F	TGACAGGAAAGTCAAGAGCACC
FABP4_R	CTGGTAGCCGTGACACCTTT
PLIN1_F	TCCTCCTGAAAAGATCGCCTC
PLIN1_R	GCGGCATATTCAGCAGTGTC
SLC27A4_F	GAGCTGCATAAAACAGGGACTTTC
SLC27A4_R	ATCCAGCATCTGTTGGCCTC
CD36_F	CACTTGAAGCAAATACAACCAGAGT
CD36_R	TCCAAGAGGTATGCTTCTTTTCCA
LPL_F	CAGCCCTGGCTTTGCTATTG
LPL_R	ACATTTGCTCAGTTTCAGCCAG
CPT1A_F	GGACCCCTGATGGTGAACAG
CPT1A_R	TGGATCCCAGGAGAATCGGT
FABP5_F	AGGCACCAGTCCGCTTATTC
FABP5_R	GCCATTCCCACTCCTACTTCC
ACSL1_F	GAAGGAAACCGAAGCCTCCA
ACSL1_R	AGTATCATCGGAGGAAGGACTGA
SCD_F	AGCTTTTCCCCAAAGCCTGT
SCD_R	GTGGAAGCCCTCACCCAC
SSC-miR306-5p_F	GCTGGGGGTGGGGT
SSC-miR306-5p_R	GGTCCAGTTTTTTTTTTTTTTTCCC
SSC-miR22-5p_F	CCTGCCCGCCGT
SSC-miR22-5p_R	GGTCCAGTTTTTTTTTTTTTTTCTACA
SSC-miR272-3p_F	CGCAGAGATGATGGCTG
SSC-miR272-3p_R	GTCCAGTTTTTTTTTTTTTTTCGC
SSC-miR381-3p_F	GTATACAAGGGCAAGCTCTC
SSC-miR381-3p_R	GGTCCAGTTTTTTTTTTTTTTTACAG
LOC110256316_L	ACAGTGGTTCCCAGATCAAGT
LOC110256316_R	CCAGGACAGGGATTTCAGGAT
LOC102167197_L	TGGGGCATATGTATTCCTCCC
LOC102167197_R	GATGCCTCTGATGTTTTCCCC
LOC110260601_L	CGACTTCTGCTGCCATAAACA
LOC110260601_R	TCCTTGCTGCAAACCCATTAC
LOC106510024_L	TCAAGTAAGCAAGCCACGGT
LOC106510024_R	CCAAAGCCCTTTGTCACACG
LOC102164789_L	AGGAGTGTGCTCCAACCAAG
LOC102164789_R	AGGAGTGTGCTCCAACCAAG
LOC110256316_L	GCCAACCTGGCACTTAGGAT
LOC110256316_R	TCGGCAGGTCAGATGACAAC

## Sheet: Table S2
Supplementary Table S2 Summary of phenotype measure in 16 essential amino acids for 52 crossbred pigs (Berkshire × AQSW)
Traits	N	Max	Min	Mean	SD
Asp	52	2.71	1.91	2.353	0.176
Thr	52	1.29	0.94	1.126	0.073
Ser	52	1.11	0.81	0.976	0.064
Glu	52	4.52	3.12	3.933	0.325
Pro	52	0.92	0.49	0.681	0.083
Gly	52	1.16	0.81	1.02	0.068
Ala	52	1.55	1.02	1.378	0.117
Val	52	1.46	1	1.232	0.095
Met	52	0.76	0.22	0.586	0.128
Ile	52	1.32	0.94	1.151	0.077
Leu	52	2.27	1.62	1.964	0.131
Tyr	52	0.98	0.72	0.874	0.056
Phe	52	1.06	0.72	0.909	0.074
His	52	1.49	1.05	1.285	0.09
Lys	52	3	1.85	2.256	0.181

## Sheet: Table S3
Supplementary Table S3 Summary of mRNA and lncRNA sequencing for each sample
Sample	Total Raw Reads (M)	Total Clean Reads (M)	Clean Reads Q20 (%)	Clean Reads Q30 (%)	Clean Reads Ratio (%)	Total Mapping(%)	Uniquely Mapping(%)
High_IMF_17F	119.94	117.71	97.96	94.23	98.14	94.11	89.06
High_IMF_18M	117.44	115.06	98.03	94.4	97.97	93.73	89.33
High_IMF_45F	119.94	117.68	97.98	94.28	98.12	93.69	90.13
High_IMF_47F	119.94	117.62	98.01	94.36	98.07	93.8	89.47
High_IMF_49M	117.44	115.16	98.06	94.51	98.06	93.93	89.51
High_IMF_51M	119.94	117.52	98.12	94.67	97.98	93.65	89.27
Low_IMF_24M	122.44	112.24	96.84	88.62	91.67	92.25	87.93
Low_IMF_27M	117.44	115.51	97.93	93.96	98.36	94.62	90.82
Low_IMF_32F	122.44	112.76	96.86	88.6	92.1	92.85	88.44
Low_IMF_33M	122.44	112.71	97.08	89.27	92.05	93	88.43
Low_IMF_41F	122.44	113.08	97.19	89.57	92.36	93.03	89.27
Low_IMF_43F	122.44	113.17	97	89	92.43	92.63	88.31
Q20: The percentage of bases with Phred value greater than 20 in the total base. Q30: The percentage of bases with Phred value greater than 30 in the total base. GC Content: Calculate the percentage of the total number of bases G and C in the total number of bases.

## Sheet: Table S4
Supplementary Table S4 Summary of miRNA sequencing for each sample
Sample	Raw Tag Count	PolyA Tag Count	Short Valid Length Tag	Clean Tag Count	Q20 of Clean Tag	Percentage of Clean Tag (%)	Total Clean Reads (M)	Total Mapping(%)
High_IMF_17F	37069386	472	416311	35055146	98.1	94.57	33.43	93.23
High_IMF_18M	37748736	506	351776	35951725	98	95.24	34.29	92.03
High_IMF_45F	37748736	599	451840	35374107	97.9	93.71	33.74	93.11
High_IMF_47F	36886917	444	579566	34374516	98.4	93.19	32.78	93.01
High_IMF_49M	37748736	475	434791	35411189	98.1	93.81	33.77	93.53
High_IMF_51M	37748736	313	275368	35948689	98.2	95.23	34.28	94.5
Low_IMF_24M	35046823	217	286341	33529629	98.2	95.67	31.98	93.79
Low_IMF_27M	37748736	419	393351	36101802	98	95.64	34.43	93.89
Low_IMF_32F	32969938	684	402353	30972087	99.1	93.94	29.54	94.85
Low_IMF_33M	36952805	571	553872	34101317	98.2	92.28	32.52	93.97
Low_IMF_41F	30789424	268	434441	28674991	98.4	93.13	27.35	94.08
Low_IMF_43F	37748736	204	401648	35837834	98.2	94.94	34.18	94.49

## Sheet: Table S5
Supplementary Table S5 Differentially expression mRNAs, miRNAs and lncRNAs between low and high IMF in crossbred pigs (Berkshire × AQSW)
DE RNA ID	RNA Symbol	RNA Type	log2(Fold Change)	P value	Q value
ENSSSCG00000000106	KCNJ4	mRNA	-3.98372	0.005757	0.013539
ENSSSCG00000000138	PVALB	mRNA	1.07438	7.89e-21	6.76e-20
ENSSSCG00000000182	WNT10B	mRNA	1.1862	0.000486	0.001385
ENSSSCG00000000186	RHEBL1	mRNA	1.45685	0.015313	0.03274
ENSSSCG00000000190	TUBA1B	mRNA	1.84261	0	0
ENSSSCG00000000203	KCNH3	mRNA	2.33821	0.002995	0.007441
ENSSSCG00000000253	KRT18	mRNA	-1.25674	0.007804	0.017883
ENSSSCG00000000257	ITGB7	mRNA	1.08201	4.23e-12	2.41e-11
ENSSSCG00000000291	GPR84	mRNA	1.41483	0.003382	0.008296
ENSSSCG00000000419	LOC100512656	mRNA	1.85758	1.52e-132	6.08e-131
ENSSSCG00000000492	LYZ	mRNA	1.03335	9.04e-05	0.000286
ENSSSCG00000000516	KCNC2	mRNA	1.26131	0.005035	0.011959
ENSSSCG00000000521	PHLDA1	mRNA	1.01628	3.69e-26	3.83e-25
ENSSSCG00000000647	OLR1	mRNA	1.14873	0.000477	0.001361
ENSSSCG00000000660	A2M	mRNA	2.09645	1.65e-51	2.89e-50
ENSSSCG00000000705	CD27	mRNA	1.43132	3.99e-05	0.000132
ENSSSCG00000000709	PLEKHG6	mRNA	-1.06172	2.58e-05	8.71e-05
ENSSSCG00000000730	PRMT8	mRNA	1.30579	0.000686	0.001904
ENSSSCG00000000739	FOXM1	mRNA	1.66836	0.003969	0.009618
ENSSSCG00000000791	PDZRN4	mRNA	-1.15364	1.6e-06	6.14e-06
ENSSSCG00000000802	NELL2	mRNA	1.44924	0.003985	0.009653
ENSSSCG00000000854	STAB2	mRNA	3.65898	4.74e-14	3.03e-13
ENSSSCG00000000950	E2F7	mRNA	1.01628	0.011965	0.026222
ENSSSCG00000000951	CSRP2	mRNA	1.08418	5.7e-09	2.67e-08
ENSSSCG00000000978	MLC1	mRNA	1.23867	0.000585	0.001643
ENSSSCG00000001011	SERPINB1	mRNA	2.33403	0	0
ENSSSCG00000001045	ELOVL2	mRNA	-2.06172	1.39e-05	4.84e-05
ENSSSCG00000001096	ARMH2	mRNA	-2.44315	0.009503	0.021324
ENSSSCG00000001234	TRIM10	mRNA	4.10374	4.42e-05	0.000146
ENSSSCG00000001473	COL11A2	mRNA	4.5873	2.24e-141	9.48e-140
ENSSSCG00000001536	SCUBE3	mRNA	1.49021	0.004672	0.011162
ENSSSCG00000001560	C7H6orf222	mRNA	3.18621	0.006833	0.01583
ENSSSCG00000001566	RAB44	mRNA	1.84635	0.000193	0.000587
ENSSSCG00000001625	PGC	mRNA	1.7442	3.96e-06	1.46e-05
ENSSSCG00000001710	RUNX2	mRNA	1.09428	2.81e-17	2.1e-16
ENSSSCG00000001729	PTCHD4	mRNA	2.56542	1.11e-77	2.76e-76
ENSSSCG00000001823	UROC1	mRNA	1.44254	0.000293	0.000865
ENSSSCG00000001832	ACAN	mRNA	3.62633	3.16e-93	9.23e-92
ENSSSCG00000001888	RPP25	mRNA	1.30579	1.57e-06	6.04e-06
ENSSSCG00000001979	LOC100739080	mRNA	6.22573	2.48e-10	1.27e-09
ENSSSCG00000002029	LOC100736765	mRNA	-2.53563	0	0
ENSSSCG00000002033	CEBPE	mRNA	-1.05411	1.09e-05	3.86e-05
ENSSSCG00000002380	ZC2HC1C	mRNA	-1.56868	0.004209	0.01015
ENSSSCG00000002398	TMEM63C	mRNA	3.18621	0.006833	0.01583
ENSSSCG00000002476	SERPINA1	mRNA	1.23867	0.009342	0.021008
ENSSSCG00000002653	JPH3	mRNA	-2.18535	7.03e-07	2.78e-06
ENSSSCG00000002709	LOC100522551	mRNA	1.32994	1.28e-06	4.96e-06
ENSSSCG00000002749	HP	mRNA	1.01628	2.15e-06	8.14e-06
ENSSSCG00000002764	SMPD3	mRNA	4.82118	7.63e-137	3.12e-135
ENSSSCG00000002802	GINS3	mRNA	-1.06988	3.34e-07	1.36e-06
ENSSSCG00000002821	CCL22	mRNA	2.60124	0.004773	0.011381
ENSSSCG00000002825	CES1	mRNA	-1.65454	6.15e-28	6.75e-27
ENSSSCG00000002831	IRX3	mRNA	-1.65899	1.02e-184	5.4e-183
ENSSSCG00000002849	SHCBP1	mRNA	3.26421	7.12e-05	0.000229
ENSSSCG00000002887	MAG	mRNA	-1.4532	0.000923	0.002513
ENSSSCG00000002983	LGALS13	mRNA	4.47571	0.000781	0.002149
ENSSSCG00000003018	LIPE	mRNA	-1.05195	0	0
ENSSSCG00000003051	CD177	mRNA	3.46559	7.34e-56	1.39e-54
ENSSSCG00000003113	C5AR2	mRNA	1.42227	6.96e-05	0.000224
ENSSSCG00000003145	FUT2	mRNA	1.67197	7.46e-126	2.86e-124
ENSSSCG00000003148	DBP	mRNA	-1.2125	3.96e-123	1.49e-121
ENSSSCG00000003149	TULP2	mRNA	-1.15364	0.001955	0.005023
ENSSSCG00000003155	PPP1R15A	mRNA	1.07211	0	0
ENSSSCG00000003236	SIGLEC5	mRNA	1.1304	1.35e-10	7.07e-10
ENSSSCG00000003236	LOC100515383	mRNA	1.76299	0.002887	0.007194
ENSSSCG00000003240	LOC100624035	mRNA	-1.13163	0.000365	0.001061
ENSSSCG00000003259	OSCAR	mRNA	1.16312	0.009267	0.020861
ENSSSCG00000003395	PIK3CD	mRNA	1.01162	2.22e-13	1.37e-12
ENSSSCG00000003399	RBP7	mRNA	1.01628	0.021779	0.044731
ENSSSCG00000003410	MASP2	mRNA	1.23867	0.009342	0.021008
ENSSSCG00000003449	LRRC38	mRNA	-1.17724	6.18e-81	1.59e-79
ENSSSCG00000003463	AGMAT	mRNA	1.25729	0.011271	0.024826
ENSSSCG00000003541	STPG1	mRNA	-3.56868	0.001132	0.003036
ENSSSCG00000003646	POU3F1	mRNA	2.39875	2.17e-165	1.03e-163
ENSSSCG00000003697	NDC80	mRNA	2.71672	0.00264	0.006629
ENSSSCG00000003711	CABYR	mRNA	2.70558	9.58e-41	1.4e-39
ENSSSCG00000003756	LPAR3	mRNA	3.82363	3.41e-10	1.74e-09
ENSSSCG00000003803	C6H1orf141	mRNA	1.17974	0.012668	0.027634
ENSSSCG00000004017	FRMD1	mRNA	1.49021	0.004672	0.011162
ENSSSCG00000004065	TIAM2	mRNA	1.02017	2.33e-269	1.73e-267
ENSSSCG00000004157	IL20RA	mRNA	3.82363	0.000289	0.000853
ENSSSCG00000004167	MYB	mRNA	2.2893	4.6e-05	0.000151
ENSSSCG00000004179	VNN2	mRNA	1.06067	0.012701	0.027702
ENSSSCG00000004180	VNN3	mRNA	2.33821	0.015369	0.03284
ENSSSCG00000004233	SMPDL3A	mRNA	-1.05735	1.29e-75	3.15e-74
ENSSSCG00000004283	DPPA5	mRNA	-2.20611	0.005911	0.013882
ENSSSCG00000004422	WISP3	mRNA	3.01628	0.012907	0.028106
ENSSSCG00000004436	COL10A1	mRNA	3.85363	8.49e-52	1.5e-50
ENSSSCG00000004452	PRSS35	mRNA	4.2061	1.57e-17	1.19e-16
ENSSSCG00000004466	TTK	mRNA	1.37885	0.023559	0.04807
ENSSSCG00000004484	COL12A1	mRNA	1.13859	3.28e-248	2.26e-246
ENSSSCG00000004554	PCLAF	mRNA	1.60124	0.02091	0.043144
ENSSSCG00000004646	ATP8B4	mRNA	2.06837	3.29e-17	2.46e-16
ENSSSCG00000004781	PAK6	mRNA	2.31945	0.000128	0.000397
ENSSSCG00000004782	BUB1B	mRNA	1.41838	0.000911	0.002483
ENSSSCG00000004889	SERPINB10	mRNA	2.18621	0.000132	0.000409
ENSSSCG00000004911	LOC100627702	mRNA	-1.44839	4.76e-06	1.74e-05
ENSSSCG00000004932	IGDCC3	mRNA	1.06137	7.47e-07	2.94e-06
ENSSSCG00000005056	DLGAP5	mRNA	4.18621	2.38e-05	8.08e-05
ENSSSCG00000005098	SYT16	mRNA	1.11144	0.002008	0.005147
ENSSSCG00000005216	RLN2	mRNA	2.82363	0.024378	0.049546
ENSSSCG00000005314	ARHGEF39	mRNA	1.1862	0.004396	0.010558
ENSSSCG00000005385	NR4A3	mRNA	1.42812	0	0
ENSSSCG00000005494	TNC	mRNA	2.14313	3.61e-231	2.33e-229
ENSSSCG00000005588	NR5A1	mRNA	-1.89061	0.009908	0.022112
ENSSSCG00000005710	LAMC3	mRNA	3.31745	2.49e-14	1.61e-13
ENSSSCG00000005723	NTNG2	mRNA	1.2326	1.37e-05	4.77e-05
ENSSSCG00000005740	SARDH	mRNA	-1.19231	1.34e-06	5.17e-06
ENSSSCG00000005780	KCNG2	mRNA	-1.06389	0.000199	0.000605
ENSSSCG00000005847	STPG3	mRNA	3.60124	0.02018	0.041762
ENSSSCG00000005902	FOXH1	mRNA	2.88105	1.27e-12	7.46e-12
ENSSSCG00000005946	WISP1	mRNA	1.04945	5.48e-05	0.000178
ENSSSCG00000005949	SLA	mRNA	1.01628	4.89e-05	0.00016
ENSSSCG00000006043	DCSTAMP	mRNA	3.77117	5.43e-07	2.16e-06
ENSSSCG00000006051	CTHRC1	mRNA	1.29868	1.33e-06	5.12e-06
ENSSSCG00000006053	BAALC	mRNA	-1.02554	0.013045	0.028333
ENSSSCG00000006138	ATP6V0D2	mRNA	6.26421	1.45e-10	7.58e-10
ENSSSCG00000006215	CRH	mRNA	-2.30565	0.016857	0.035649
ENSSSCG00000006287	SELL	mRNA	1.8667	4.4e-13	2.65e-12
ENSSSCG00000006403	CRP	mRNA	-1.45184	2.35e-08	1.05e-07
ENSSSCG00000006431	SPTA1	mRNA	3.92317	3.78e-14	2.42e-13
ENSSSCG00000006466	SH2D2A	mRNA	1.23867	0.024382	0.049515
ENSSSCG00000006474	NES	mRNA	1.36713	0	0
ENSSSCG00000006545	CHRNB2	mRNA	-3.56868	0.021336	0.043927
ENSSSCG00000006588	S100A9	mRNA	3.70278	3.09e-84	8.23e-83
ENSSSCG00000006590	S100A8	mRNA	3.76142	1.67e-61	3.45e-60
ENSSSCG00000006618	CELF3	mRNA	3.54235	0.02371	0.048343
ENSSSCG00000006719	HSD3B1	mRNA	-3.15364	0.007423	0.01708
ENSSSCG00000006748	TSPAN2	mRNA	1.33821	0.019661	0.040859
ENSSSCG00000006764	PTPN22	mRNA	1.35508	0.000553	0.001562
ENSSSCG00000006804	CYM	mRNA	1.28619	4.53e-08	1.98e-07
ENSSSCG00000006857	COL11A1	mRNA	1.9399	3.14e-63	6.6e-62
ENSSSCG00000006902	GFI1	mRNA	1.50171	2.06e-05	7.06e-05
ENSSSCG00000007082	OTOR	mRNA	1.57308	0.02395	0.04878
ENSSSCG00000007170	CPXM1	mRNA	1.01628	1.55e-30	1.84e-29
ENSSSCG00000007317	DLGAP4	mRNA	1.02346	0	0
ENSSSCG00000007351	FAM83D	mRNA	1.71672	6.21e-06	2.25e-05
ENSSSCG00000007410	PTI	mRNA	1.6059	2.47e-07	1.02e-06
ENSSSCG00000007423	UBE2C	mRNA	2.5606	1.77e-06	6.77e-06
ENSSSCG00000007436	MMP9	mRNA	5.50428	4.58e-267	3.38e-265
ENSSSCG00000007507	PCK1	mRNA	1.71672	1.65e-10	8.57e-10
ENSSSCG00000007523	TUBB1	mRNA	2.82363	6.72e-06	2.43e-05
ENSSSCG00000007569	GRIFIN	mRNA	-2.56868	0.005326	0.012595
ENSSSCG00000007607	KPNA7	mRNA	-1.22251	0.000205	0.00062
ENSSSCG00000007642	AZGP1	mRNA	-1.17636	0.007987	0.018254
ENSSSCG00000007760	PRSS36	mRNA	1.43132	3.19e-41	4.72e-40
ENSSSCG00000008032	LOC396700	mRNA	2.33821	0.002995	0.007441
ENSSSCG00000008326	TGFA	mRNA	1.27468	0.00022	0.000663
ENSSSCG00000008421	LHCGR	mRNA	-2.79107	5.02e-08	2.19e-07
ENSSSCG00000008555	CGREF1	mRNA	1.9961	4.93e-09	2.32e-08
ENSSSCG00000008585	PFN4	mRNA	3.47571	0.001919	0.004943
ENSSSCG00000008586	TP53I3	mRNA	-2.20611	0.005911	0.013882
ENSSSCG00000008590	MFSD2B	mRNA	1.08847	0.004991	0.011862
ENSSSCG00000008603	MATN3	mRNA	2.82363	0.024378	0.049546
ENSSSCG00000008625	NTSR2	mRNA	1.94228	2.78e-09	1.33e-08
ENSSSCG00000008645	ID2	mRNA	1.02509	7.5e-21	6.43e-20
ENSSSCG00000008677	TACC3	mRNA	1.20696	8.15e-07	3.2e-06
ENSSSCG00000008725	CYTL1	mRNA	4.82364	5.37e-08	2.34e-07
ENSSSCG00000008747	NCAPG	mRNA	2.78181	8.51e-07	3.34e-06
ENSSSCG00000008770	NWD2	mRNA	4.18621	0.002804	0.007009
ENSSSCG00000008809	GABRG1	mRNA	-1.01614	7.79e-05	0.000249
ENSSSCG00000008963	AREG	mRNA	2.82363	0.024378	0.049546
ENSSSCG00000008994	RBM46	mRNA	-3.56868	0.021336	0.043927
ENSSSCG00000009046	GYPA	mRNA	2.4086	4.32e-07	1.74e-06
ENSSSCG00000009188	STPG2	mRNA	1.13176	0.000977	0.002649
ENSSSCG00000009216	SPP1	mRNA	6.2302	0	0
ENSSSCG00000009219	IBSP	mRNA	8.02003	1.59e-163	7.44e-162
ENSSSCG00000009220	DMP1	mRNA	1.03456	4.9e-26	5.05e-25
ENSSSCG00000009237	HPSE	mRNA	1.44512	0.001071	0.002879
ENSSSCG00000009250	PRKG2	mRNA	3.5606	2.32e-08	1.03e-07
ENSSSCG00000009334	HSPH1	mRNA	1.07611	0	0
ENSSSCG00000009347	KL	mRNA	3.01249	2.71e-05	9.13e-05
ENSSSCG00000009429	TNFSF11	mRNA	5.33821	3.28e-06	1.22e-05
ENSSSCG00000009445	LOC100155738	mRNA	2.82363	6.72e-06	2.43e-05
ENSSSCG00000009495	LOC106505329	mRNA	3.33496	6.24e-09	2.91e-08
ENSSSCG00000009499	LOC100517850	mRNA	3.04573	0.000359	0.001045
ENSSSCG00000009558	F10	mRNA	1.83027	7.95e-12	4.46e-11
ENSSSCG00000009592	NFIL3	mRNA	2.00781	0	0
ENSSSCG00000009678	FBXO16	mRNA	3.60124	0.02018	0.041762
ENSSSCG00000009798	B3GNT4	mRNA	2.26159	0.000426	0.001227
ENSSSCG00000009842	CCDC60	mRNA	-2.22076	2.2e-05	7.51e-05
ENSSSCG00000009927	FAM222A	mRNA	1.60468	0	0
ENSSSCG00000009979	NEFH	mRNA	3.42227	1.31e-11	7.25e-11
ENSSSCG00000010007	MTFP1	mRNA	-1.01317	1.83e-100	5.65e-99
ENSSSCG00000010039	SLC5A4	mRNA	-1.14885	1.64e-29	1.88e-28
ENSSSCG00000010048	RAB36	mRNA	1.15924	0.000691	0.001916
ENSSSCG00000010096	AIFM3	mRNA	1.51878	0.017996	0.037763
ENSSSCG00000010201	RASGEF1A	mRNA	2.59209	5.1e-43	7.8e-42
ENSSSCG00000010219	ARID5B	mRNA	1.16854	0	0
ENSSSCG00000010352	GRID1	mRNA	1.01628	0.006637	0.015425
ENSSSCG00000010445	ANKRD22	mRNA	1.60124	0.011405	0.025104
ENSSSCG00000010461	ANKRD1	mRNA	2.77377	0	0
ENSSSCG00000010530	CRTAC1	mRNA	1.50457	2.28e-30	2.68e-29
ENSSSCG00000010581	PSD	mRNA	1.37885	0.023559	0.04807
ENSSSCG00000010664	ENO4	mRNA	-1.95571	1.15e-06	4.46e-06
ENSSSCG00000010666	VAX1	mRNA	-1.60904	7.75e-13	4.6e-12
ENSSSCG00000010701	BTBD16	mRNA	1.92317	0.008705	0.01973
ENSSSCG00000010746	ADAM12	mRNA	1.51697	6.52e-40	9.34e-39
ENSSSCG00000010779	SYCE1	mRNA	-1.79107	0.01633	0.034663
ENSSSCG00000010896	ASPM	mRNA	1.95271	5.63e-13	3.37e-12
ENSSSCG00000010912	KIF14	mRNA	1.71672	0.001396	0.003692
ENSSSCG00000010922	ELF3	mRNA	5.77117	1.75e-14	1.15e-13
ENSSSCG00000010966	CCL19	mRNA	-1.16592	0.000348	0.001017
ENSSSCG00000011059	MYO3A	mRNA	5.01628	4.98e-09	2.34e-08
ENSSSCG00000011065	MASTL	mRNA	4.56225	2.07e-133	8.32e-132
ENSSSCG00000011069	ARMC4	mRNA	4.47571	0.000781	0.002149
ENSSSCG00000011076	OTUD1	mRNA	1.63254	0	0
ENSSSCG00000011133	PFKFB3	mRNA	1.05774	0	0
ENSSSCG00000011246	VILL	mRNA	-1.03263	1.5e-08	6.77e-08
ENSSSCG00000011264	CSRNP1	mRNA	1.344	5.2e-240	3.44e-238
ENSSSCG00000011310	ZNF660	mRNA	-1.39876	0.008582	0.019476
ENSSSCG00000011322	CCR1	mRNA	1.19426	8.12e-09	3.75e-08
ENSSSCG00000011334	LOC100736951	mRNA	4.28477	3.07e-48	5.13e-47
ENSSSCG00000011349	PR39	mRNA	3.44315	2.26e-129	8.86e-128
ENSSSCG00000011349	PMAP-23	mRNA	3.5444	4.37e-41	6.45e-40
ENSSSCG00000011349	NPG4	mRNA	3.83635	1.49e-153	6.69e-152
ENSSSCG00000011397	SLC38A3	mRNA	-1.02664	0	0
ENSSSCG00000011450	ITIH1	mRNA	-1.30565	0.001288	0.003424
ENSSSCG00000011627	ACPP	mRNA	3.47571	0.001919	0.004943
ENSSSCG00000011806	MASP1	mRNA	-1.04432	1.1e-54	2.03e-53
ENSSSCG00000011812	TPRG1	mRNA	4.6729	1.68e-53	3.08e-52
ENSSSCG00000011821	ATP13A4	mRNA	5.10374	1.94e-05	6.67e-05
ENSSSCG00000011837	MELTF	mRNA	2.50171	2.47e-05	8.37e-05
ENSSSCG00000011851	MUC20	mRNA	-3.15364	0.007423	0.01708
ENSSSCG00000011945	LOC100519871	mRNA	6.93443	1.59e-15	1.1e-14
ENSSSCG00000011947	ZPLD1	mRNA	3.60124	0.02018	0.041762
ENSSSCG00000012066	KCNJ15	mRNA	2.27931	0.000218	0.000656
ENSSSCG00000012160	SH3KBP1	mRNA	1.11565	5.24e-56	9.96e-55
ENSSSCG00000012167	PHEX	mRNA	1.22064	8.52e-21	7.29e-20
ENSSSCG00000012307	CCNB3	mRNA	1.73249	0.002488	0.006273
ENSSSCG00000012492	DRP2	mRNA	-1.67953	2.74e-27	2.95e-26
ENSSSCG00000012536	PLP1	mRNA	-1.18535	6.04e-06	2.19e-05
ENSSSCG00000012631	LONRF3	mRNA	1.0175	5.14e-275	3.89e-273
ENSSSCG00000012651	XPNPEP2	mRNA	-2.15364	0.000166	0.000508
ENSSSCG00000012733	LOC106504240	mRNA	-3.15791	3.37e-06	1.25e-05
ENSSSCG00000012754	GABRE	mRNA	-2.07118	0.003555	0.008682
ENSSSCG00000012853	IRF7	mRNA	2.68699	0	0
ENSSSCG00000012880	CPT1A	mRNA	1.15268	0	0
ENSSSCG00000012967	FOSL1	mRNA	4.39875	3.51e-34	4.51e-33
ENSSSCG00000012975	SNX32	mRNA	1.40822	3.12e-32	3.87e-31
ENSSSCG00000013092	PGA5	mRNA	-4.15364	0.003025	0.007505
ENSSSCG00000013150	LOC100517803	mRNA	2.19842	5.43e-06	1.98e-05
ENSSSCG00000013303	ABTB2	mRNA	1.14009	5.03e-57	9.65e-56
ENSSSCG00000013316	WT1	mRNA	-2.15364	0.002106	0.005385
ENSSSCG00000013352	E2F8	mRNA	2.53984	0.000116	0.000361
ENSSSCG00000013354	CSRP3	mRNA	-1.16391	0	0
ENSSSCG00000013415	AZU1	mRNA	4.31584	2.74e-114	9.5e-113
ENSSSCG00000013417	PRTN3	mRNA	4.97821	9.84e-89	2.74e-87
ENSSSCG00000013494	MATK	mRNA	1.22573	3.09e-09	1.47e-08
ENSSSCG00000013517	UHRF1	mRNA	1.56472	2.25e-10	1.16e-09
ENSSSCG00000013556	ADGRE1	mRNA	1.14668	3.2e-05	0.000107
ENSSSCG00000013575	RETN	mRNA	2.78181	8.51e-07	3.34e-06
ENSSSCG00000013599	ANGPTL4	mRNA	-1.19938	2.97e-283	2.34e-281
ENSSSCG00000013617	ELAVL3	mRNA	3.64077	6.95e-09	3.23e-08
ENSSSCG00000013618	EPOR	mRNA	2.92317	0.000799	0.002194
ENSSSCG00000013730	KLF1	mRNA	3.82363	0.010367	0.02302
ENSSSCG00000013733	BEST2	mRNA	-3.56868	0.021336	0.043927
ENSSSCG00000013753	IER2	mRNA	1.51593	1.67e-182	8.67e-181
ENSSSCG00000013765	RLN3	mRNA	1.90381	1.36e-12	7.96e-12
ENSSSCG00000013766	IL27RA	mRNA	1.26833	2.18e-31	2.64e-30
ENSSSCG00000013785	LOC110259331	mRNA	1.31051	3.48e-07	1.41e-06
ENSSSCG00000013787	ADGRE3	mRNA	2.01628	0.000618	0.001731
ENSSSCG00000013788	LOC100516957	mRNA	1.29879	5.32e-10	2.68e-09
ENSSSCG00000013842	LOC110259329	mRNA	1.02219	2.52e-05	8.53e-05
ENSSSCG00000013880	UNC13A	mRNA	-1.17135	0.002768	0.006927
ENSSSCG00000013916	COMP	mRNA	2.16312	4.72e-05	0.000154
ENSSSCG00000013934	CILP2	mRNA	2.67924	0.000308	0.000907
ENSSSCG00000014093	CRHBP	mRNA	2.71672	0.00264	0.006629
ENSSSCG00000014124	ANKRD34B	mRNA	1.82363	0.014481	0.031144
ENSSSCG00000014137	HAPLN1	mRNA	3.97048	4.74e-08	2.07e-07
ENSSSCG00000014196	TMEM232	mRNA	-1.09063	0.019549	0.040667
ENSSSCG00000014214	TRIM36	mRNA	1.35188	0.00013	0.000402
ENSSSCG00000014238	PRDM6	mRNA	-1.32075	0.000375	0.001087
ENSSSCG00000014259	ADAMTS19	mRNA	1.07423	7.83e-07	3.08e-06
ENSSSCG00000014272	ACSL6	mRNA	1.01799	2.43e-05	8.26e-05
ENSSSCG00000014278	IL5	mRNA	3.60124	0.02018	0.041762
ENSSSCG00000014293	FSTL4	mRNA	1.28055	1.41e-14	9.31e-14
ENSSSCG00000014362	HBEGF	mRNA	1.11366	0	0
ENSSSCG00000014618	LOC110255361	mRNA	1.33901	8.1e-65	1.75e-63
ENSSSCG00000014630	CNGA4	mRNA	1.05581	0.008567	0.019449
ENSSSCG00000014825	RELT	mRNA	1.11475	3.6e-36	4.8e-35
ENSSSCG00000014861	MOGAT2	mRNA	4.01628	0.005371	0.012689
ENSSSCG00000014943	DEUP1	mRNA	2.51878	0.00097	0.00263
ENSSSCG00000014985	MMP3	mRNA	3.60124	0.02018	0.041762
ENSSSCG00000014988	MMP13	mRNA	7.78356	1.62e-243	1.09e-241
ENSSSCG00000015037	IL18	mRNA	1.25314	7.92e-11	4.19e-10
ENSSSCG00000015045	NCAM1	mRNA	1.04918	0	0
ENSSSCG00000015119	MFRP	mRNA	-1.0992	0.005552	0.013087
ENSSSCG00000015126	TRIM29	mRNA	-1.62115	0.001546	0.004055
ENSSSCG00000015194	PANX3	mRNA	5.4086	1.82e-06	6.96e-06
ENSSSCG00000015246	ST14	mRNA	1.93382	2.07e-08	9.24e-08
ENSSSCG00000015303	CFAP69	mRNA	3.33821	0.003619	0.008822
ENSSSCG00000015326	COL1A2	mRNA	1.74618	0	0
ENSSSCG00000015332	PON1	mRNA	3.82363	0.010367	0.02302
ENSSSCG00000015342	COL28A1	mRNA	1.01628	0.000103	0.000322
ENSSSCG00000015377	ABCB5	mRNA	3.47571	0.001919	0.004943
ENSSSCG00000015396	SEMA3D	mRNA	1.10791	4.26e-13	2.58e-12
ENSSSCG00000015487	TNFSF18	mRNA	1.33821	0.000467	0.001334
ENSSSCG00000015507	TNN	mRNA	1.23867	0.009342	0.021008
ENSSSCG00000015581	CENPF	mRNA	1.83731	1.74e-06	6.64e-06
ENSSSCG00000015595	ATF3	mRNA	1.29549	0	0
ENSSSCG00000015617	G0S2	mRNA	1.27772	8.85e-62	1.83e-60
ENSSSCG00000015716	MARCO	mRNA	1.92317	0.008705	0.01973
ENSSSCG00000015732	TFCP2L1	mRNA	-1.4532	0.000923	0.002513
ENSSSCG00000015767	SPATA4	mRNA	2.56472	2.27e-18	1.77e-17
ENSSSCG00000015785	CENPU	mRNA	2.58263	7.55e-24	7.24e-23
ENSSSCG00000015795	CCDC110	mRNA	2.46474	1.8e-37	2.45e-36
ENSSSCG00000015830	UNC5D	mRNA	-3.56868	0.021336	0.043927
ENSSSCG00000015871	NR4A2	mRNA	1.00335	2.65e-288	2.13e-286
ENSSSCG00000015907	GALNT3	mRNA	1.86428	0.004887	0.011636
ENSSSCG00000015986	HOXD1	mRNA	1.96882	0	0
ENSSSCG00000016022	ZNF804A	mRNA	3.18621	0.006833	0.01583
ENSSSCG00000016166	SPAG16	mRNA	-1.69663	5.21e-253	3.64e-251
ENSSSCG00000016184	CXCR2	mRNA	1.28726	2.72e-08	1.2e-07
ENSSSCG00000016204	IHH	mRNA	5.66014	1.82e-07	7.58e-07
ENSSSCG00000016218	PTPRN	mRNA	-3.98372	0.005757	0.013539
ENSSSCG00000016225	MOGAT1	mRNA	-1.04276	8.27e-242	5.52e-240
ENSSSCG00000016256	SPHKAP	mRNA	2.89075	1.12e-08	5.12e-08
ENSSSCG00000016258	DNER	mRNA	-1.14518	2.32e-05	7.9e-05
ENSSSCG00000016286	PRSS56	mRNA	1.1862	0.013638	0.029501
ENSSSCG00000016287	CHRND	mRNA	-1.28489	6.8e-17	5e-16
ENSSSCG00000016294	SNORC	mRNA	3.60124	0.001019	0.002755
ENSSSCG00000016335	ESPNL	mRNA	-1.21721	9.34e-24	8.95e-23
ENSSSCG00000016342	HES6	mRNA	2.31823	9.16e-102	2.85e-100
ENSSSCG00000016459	EPHA1	mRNA	1.69435	0.013004	0.02826
ENSSSCG00000016516	ATP6V0A4	mRNA	1.96381	0.000359	0.001044
ENSSSCG00000016555	CPA5	mRNA	1.37762	5.5e-12	3.11e-11
ENSSSCG00000016555	CPA4	mRNA	2.73676	6.71e-24	6.45e-23
ENSSSCG00000016599	GPR37	mRNA	-1.56868	0.007424	0.017078
ENSSSCG00000016642	GPR85	mRNA	1.04376	0.001827	0.004729
ENSSSCG00000016673	GHRHR	mRNA	-2.08326	0.000102	0.000319
ENSSSCG00000016915	IL31RA	mRNA	-1.39876	0.008582	0.019476
ENSSSCG00000017036	CCNJL	mRNA	2.15378	0.000629	0.001759
ENSSSCG00000017041	ADRA1B	mRNA	-1.04646	3.53e-05	0.000117
ENSSSCG00000017098	C16H5orf49	mRNA	1.33821	0.019661	0.040859
ENSSSCG00000017141	AATK	mRNA	-1.01964	6.86e-11	3.64e-10
ENSSSCG00000017160	CBX4	mRNA	2.21415	7.98e-158	3.66e-156
ENSSSCG00000017313	CRHR1	mRNA	2.82363	6.72e-06	2.43e-05
ENSSSCG00000017342	KIF18B	mRNA	1.02468	0.004036	0.009763
ENSSSCG00000017349	ADAM11	mRNA	-1.46915	0.003224	0.007944
ENSSSCG00000017358	SLC4A1	mRNA	1.23798	6.95e-23	6.44e-22
ENSSSCG00000017372	MPP3	mRNA	-1.02436	4.89e-07	1.96e-06
ENSSSCG00000017379	ETV4	mRNA	-1.24249	5.77e-76	1.41e-74
ENSSSCG00000017392	CCR10	mRNA	3.60124	0.02018	0.041762
ENSSSCG00000017466	CCR7	mRNA	3.15014	1.55e-15	1.07e-14
ENSSSCG00000017473	TOP2A	mRNA	1.38306	1.19e-07	5.01e-07
ENSSSCG00000017569	CHAD	mRNA	4.31274	2.58e-174	1.27e-172
ENSSSCG00000017589	DLX3	mRNA	4.03865	1.89e-15	1.3e-14
ENSSSCG00000017630	EPX	mRNA	4.20045	4.69e-112	1.61e-110
ENSSSCG00000017637	MPO	mRNA	4.46436	4.27e-143	1.84e-141
ENSSSCG00000017641	HSF5	mRNA	1.55881	1.69e-06	6.47e-06
ENSSSCG00000017643	2021-09-04	mRNA	1.88029	0	0
ENSSSCG00000017758	SPAG5	mRNA	1.0581	0.010426	0.023132
ENSSSCG00000017863	TRPV1	mRNA	3.33821	0.003619	0.008822
ENSSSCG00000017884	TEKT1	mRNA	-1.06389	0.000199	0.000605
ENSSSCG00000017908	GP1BA	mRNA	2.13397	0.008928	0.020178
ENSSSCG00000017923	ALOX15	mRNA	3.34271	4.05e-61	8.25e-60
ENSSSCG00000018005	LOC110255887	mRNA	2.9599	0	0
ENSSSCG00000018047	FAM83G	mRNA	1.18739	1.2e-16	8.74e-16
ENSSSCG00000018049	SLC5A10	mRNA	-1.25552	9.02e-07	3.53e-06
ENSSSCG00000020666	EHD4	mRNA	1.04263	9.82e-110	3.3e-108
ENSSSCG00000020736	ADD2	mRNA	1.78181	0.008008	0.018287
ENSSSCG00000020780	PRSS57	mRNA	6.10374	1.24e-09	6.1e-09
ENSSSCG00000020837	CEACAM1	mRNA	1.31196	1.5e-06	5.78e-06
ENSSSCG00000020864	VDR	mRNA	2.13176	1.56e-25	1.57e-24
ENSSSCG00000020884	GPR179	mRNA	1.06519	0.000746	0.00206
ENSSSCG00000021305	LOC102162178	mRNA	-3.10684	8.25e-07	3.24e-06
ENSSSCG00000021525	TAS2R4	mRNA	-1.14811	1.57e-07	6.57e-07
ENSSSCG00000021569	MMP25	mRNA	2.72312	8.01e-94	2.35e-92
ENSSSCG00000021573	KCNJ5	mRNA	4.36678	2.67e-24	2.6e-23
ENSSSCG00000021597	PHLDA2	mRNA	2.7399	3.4e-40	4.92e-39
ENSSSCG00000021873	CRABP1	mRNA	1.41221	0.000122	0.000379
ENSSSCG00000021956	LY75	mRNA	2.2451	9.38e-11	4.95e-10
ENSSSCG00000022009	DDC	mRNA	1.06812	5.76e-05	0.000187
ENSSSCG00000022105	SUCNR1	mRNA	2.33821	0.000609	0.001707
ENSSSCG00000022129	ARSE	mRNA	1.39159	0.022487	0.046093
ENSSSCG00000022175	MYH15	mRNA	-1.15705	1.89e-06	7.21e-06
ENSSSCG00000022250	SPACA9	mRNA	-1.36096	5.67e-29	6.42e-28
ENSSSCG00000022256	DEPP1	mRNA	1.54253	6.02e-263	4.34e-261
ENSSSCG00000022258	LOC100512873	mRNA	3.1267	2.95e-18	2.29e-17
ENSSSCG00000022380	SH2D3A	mRNA	1.29531	3.12e-23	2.93e-22
ENSSSCG00000022405	P2RX1	mRNA	1.84225	3.97e-05	0.000131
ENSSSCG00000022499	TLX2	mRNA	2.23867	0.005217	0.01235
ENSSSCG00000022554	MATN1	mRNA	5.26421	5.9e-06	2.14e-05
ENSSSCG00000022614	DQX1	mRNA	2.82363	0.024378	0.049546
ENSSSCG00000022719	RAB20	mRNA	1.21791	0.020089	0.041632
ENSSSCG00000022721	CDH16	mRNA	3.47571	7.72e-08	3.31e-07
ENSSSCG00000022987	TMEM132E	mRNA	-1.68416	0.00172	0.004467
ENSSSCG00000023004	FZD9	mRNA	1.27344	6.72e-07	2.66e-06
ENSSSCG00000023090	BEST1	mRNA	2.45685	3.67e-17	2.73e-16
ENSSSCG00000023178	BATF2	mRNA	1.48759	4.35e-10	2.2e-09
ENSSSCG00000023289	GREM2	mRNA	4.01628	0.005371	0.012689
ENSSSCG00000023298	SRXN1	mRNA	1.68607	3.42e-187	1.83e-185
ENSSSCG00000023338	CHRNA6	mRNA	3.15378	2.63e-09	1.26e-08
ENSSSCG00000023403	LGR6	mRNA	3.01628	3.11e-19	2.51e-18
ENSSSCG00000023501	CCKAR	mRNA	1.23867	0.009342	0.021008
ENSSSCG00000023591	ADGRF2	mRNA	1.77117	2.81e-11	1.53e-10
ENSSSCG00000023607	LOC100620265	mRNA	3.15378	6.27e-25	6.22e-24
ENSSSCG00000023743	CLDN6	mRNA	1.53857	5.26e-07	2.1e-06
ENSSSCG00000024233	RAB39B	mRNA	2.33821	0.015369	0.03284
ENSSSCG00000024305	MT3	mRNA	2.82363	0.024378	0.049546
ENSSSCG00000024312	ID4	mRNA	2.26867	8.71e-102	2.72e-100
ENSSSCG00000024347	CRISP3	mRNA	2.51878	3.08e-06	1.15e-05
ENSSSCG00000024392	THEMIS	mRNA	1.60124	0.02091	0.043144
ENSSSCG00000024416	LOC100736982	mRNA	2.95971	1.26e-131	4.99e-130
ENSSSCG00000024671	WNT9A	mRNA	3.99822	0	0
ENSSSCG00000024800	DSC2	mRNA	-1.56868	0.023658	0.048254
ENSSSCG00000024914	CFB	mRNA	1.23867	0.009342	0.021008
ENSSSCG00000024973	GBP1	mRNA	1.15305	6.43e-50	1.1e-48
ENSSSCG00000025128	CPN2	mRNA	-3.56868	0.021336	0.043927
ENSSSCG00000025523	COL2A1	mRNA	4.8947	7.2e-199	4.07e-197
ENSSSCG00000025578	ALDH1A2	mRNA	-1.57881	5.26e-34	6.73e-33
ENSSSCG00000025698	SERPINE1	mRNA	1.28161	1.33e-92	3.86e-91
ENSSSCG00000025708	GABRA3	mRNA	1.69435	0.013004	0.02826
ENSSSCG00000025787	TMEM72	mRNA	-1.60542	0.00028	0.00083
ENSSSCG00000025795	CSF3R	mRNA	1.36206	8.52e-13	5.04e-12
ENSSSCG00000025846	CCR8	mRNA	1.92317	0.000207	0.000627
ENSSSCG00000025869	CABP7	mRNA	-1.19671	0.000687	0.001907
ENSSSCG00000025975	FAM83E	mRNA	1.57267	3.15e-05	0.000105
ENSSSCG00000025993	SGPP2	mRNA	1.10382	0.002195	0.00559
ENSSSCG00000026149	PKLR	mRNA	2.43132	0.001709	0.004443
ENSSSCG00000026257	STMN1	mRNA	2.21534	0	0
ENSSSCG00000026302	MKI67	mRNA	1.43448	6.63e-32	8.15e-31
ENSSSCG00000026333	GTSF1	mRNA	3.26421	1.94e-08	8.67e-08
ENSSSCG00000026363	CHRNB3	mRNA	-1.25674	0.007804	0.017883
ENSSSCG00000026386	SLC30A2	mRNA	1.48759	1.08e-18	8.58e-18
ENSSSCG00000026402	LOC100522787	mRNA	1.73875	0.000281	0.000832
ENSSSCG00000026407	NCCRP1	mRNA	2.10374	0.003067	0.007596
ENSSSCG00000026433	CCDC73	mRNA	-1.23165	0.000241	0.00072
ENSSSCG00000026455	TMEM54	mRNA	1.15378	0.007644	0.017546
ENSSSCG00000026707	XCR1	mRNA	1.52957	2.06e-19	1.67e-18
ENSSSCG00000026842	CDH18	mRNA	1.33821	0.004276	0.010295
ENSSSCG00000026868	LRRC15	mRNA	4.75325	4.74e-20	3.95e-19
ENSSSCG00000026978	ROS1	mRNA	1.08107	3.74e-40	5.4e-39
ENSSSCG00000027091	OAZ3	mRNA	-1.21085	3.47e-42	5.25e-41
ENSSSCG00000027121	ODC1	mRNA	1.10829	0	0
ENSSSCG00000027147	CENPH	mRNA	2.60124	0.000548	0.001548
ENSSSCG00000027161	PIP5K1B	mRNA	1.00563	1.4e-06	5.4e-06
ENSSSCG00000027266	PNPLA3	mRNA	-1.25381	0.001591	0.004163
ENSSSCG00000027275	HHLA2	mRNA	-2.12122	0.00076	0.002095
ENSSSCG00000027404	UNC93A	mRNA	-1.01566	1.1e-06	4.27e-06
ENSSSCG00000027528	TMEM107	mRNA	1.29313	1.87e-154	8.45e-153
ENSSSCG00000027553	LOC110255185	mRNA	4.07942	2.78e-93	8.12e-92
ENSSSCG00000027553	LOC100739611	mRNA	4.12109	9.68e-180	4.9e-178
ENSSSCG00000027607	IER3	mRNA	1.53697	6.2e-66	1.36e-64
ENSSSCG00000027688	RNF183	mRNA	1.56699	0.000604	0.001695
ENSSSCG00000027855	SOCS1	mRNA	3.51695	3.61e-254	2.54e-252
ENSSSCG00000027860	ERAP2	mRNA	1.09428	1.53e-107	5.08e-106
ENSSSCG00000027874	LOC102167734	mRNA	2.71672	0.00264	0.006629
ENSSSCG00000027875	CA14	mRNA	-1.16821	0	0
ENSSSCG00000027984	ZWINT	mRNA	1.30718	3.94e-08	1.73e-07
ENSSSCG00000028204	TREH	mRNA	2.78315	1.33e-07	5.6e-07
ENSSSCG00000028322	BTG2	mRNA	1.29669	0	0
ENSSSCG00000028623	RARRES1	mRNA	1.23309	5.65e-06	2.06e-05
ENSSSCG00000028643	SLC6A20	mRNA	1.56967	9.89e-19	7.83e-18
ENSSSCG00000028671	CEL	mRNA	1.8565	3.19e-12	1.83e-11
ENSSSCG00000028802	LOC100622710	mRNA	1.06407	5.29e-09	2.48e-08
ENSSSCG00000028871	LOC396866	mRNA	4.01628	0.005371	0.012689
ENSSSCG00000029061	BMP3	mRNA	2.71672	2.12e-05	7.23e-05
ENSSSCG00000029114	LOC110262266	mRNA	3.7518	0.012989	0.02824
ENSSSCG00000029186	SEZ6L2	mRNA	1.32294	0.000393	0.001138
ENSSSCG00000029268	TOPAZ1	mRNA	1.30124	3.2e-22	2.89e-21
ENSSSCG00000029414	FCN1	mRNA	1.52229	7.59e-14	4.8e-13
ENSSSCG00000029484	EMB	mRNA	1.13275	9.08e-19	7.2e-18
ENSSSCG00000029503	F7	mRNA	2.33821	0.015369	0.03284
ENSSSCG00000029511	UBASH3A	mRNA	1.05581	0.008567	0.019449
ENSSSCG00000029515	PON3	mRNA	1.36844	4.34e-55	8.1e-54
ENSSSCG00000029635	GRIN3B	mRNA	-1.27323	0.019236	0.040082
ENSSSCG00000029675	MMP8	mRNA	3.729	1.74e-25	1.75e-24
ENSSSCG00000029783	MKX	mRNA	1.3244	0.00019	0.000579
ENSSSCG00000029879	LTF	mRNA	2.64754	4.23e-159	1.95e-157
ENSSSCG00000029990	DEFB1	mRNA	1.68752	1.86e-33	2.36e-32
ENSSSCG00000030114	SPATA9	mRNA	1.67925	0.007158	0.016513
ENSSSCG00000030228	PIWIL2	mRNA	2.22525	2.38e-13	1.47e-12
ENSSSCG00000030300	MT-2B	mRNA	1.30793	3.1e-19	2.5e-18
ENSSSCG00000030388	UPP1	mRNA	1.91674	4.24e-07	1.71e-06
ENSSSCG00000030485	ELFN1	mRNA	1.46038	1.66e-09	8.06e-09
ENSSSCG00000030582	BATF	mRNA	1.47571	0.008427	0.019159
ENSSSCG00000030879	LOC110259710	mRNA	5.60124	4.97e-13	2.99e-12
ENSSSCG00000030998	WIF1	mRNA	6.4798	2.03e-84	5.42e-83
ENSSSCG00000031090	LOC110258650	mRNA	3.08984	1.42e-245	9.72e-244
ENSSSCG00000031090	LOC110258648	mRNA	3.42103	6.5e-132	2.59e-130
ENSSSCG00000031235	REN	mRNA	1.53984	0.005441	0.012841
ENSSSCG00000031378	LOC100154105	mRNA	1.09535	9.25e-64	1.96e-62
ENSSSCG00000031445	LOC100154932	mRNA	-2.15004	0.002129	0.005437
ENSSSCG00000031581	LOC110258854	mRNA	2.37945	0.012991	0.028243
ENSSSCG00000031620	LOC110256054	mRNA	2.60502	0.02423	0.049288
ENSSSCG00000031700	SLC2A9	mRNA	-1.64668	0.008358	0.019016
ENSSSCG00000031736	MGST2	mRNA	-1.07394	3.89e-72	9.2e-71
ENSSSCG00000031778	LOC110255328	mRNA	-3.63448	0.017725	0.037255
ENSSSCG00000031815	LOC110255391	mRNA	-1.15926	0.009277	0.020876
ENSSSCG00000031937	BHLHE23	mRNA	-1.27918	0.009248	0.020821
ENSSSCG00000032082	BMP8A	mRNA	5.28868	1.03e-10	5.39e-10
ENSSSCG00000032113	LOC100523609	mRNA	1.22394	0.001776	0.004605
ENSSSCG00000032151	CPZ	mRNA	1.79261	2.51e-16	1.81e-15
ENSSSCG00000032162	P2RY13	mRNA	1.90936	0.000587	0.001649
ENSSSCG00000032164	PEA15	mRNA	1.75135	0	0
ENSSSCG00000032167	PABPC1L2A	mRNA	2.91158	0.000859	0.002347
ENSSSCG00000032170	DAPK3	mRNA	1.18727	0	0
ENSSSCG00000032221	FAM110C	mRNA	-1.15364	0.000692	0.00192
ENSSSCG00000032249	GBX1	mRNA	1.44423	1.15e-26	1.22e-25
ENSSSCG00000032279	SAPCD2	mRNA	1.67524	1.83e-06	6.98e-06
ENSSSCG00000032282	ACP5	mRNA	5.86341	0	0
ENSSSCG00000032303	ENTPD2	mRNA	-1.78209	1.06e-08	4.85e-08
ENSSSCG00000032360	PANX1	mRNA	1.07517	3.02e-14	1.95e-13
ENSSSCG00000032474	CXCL10	mRNA	1.47118	1.59e-12	9.3e-12
ENSSSCG00000032496	LOC100622387	mRNA	1.34079	4.52e-09	2.13e-08
ENSSSCG00000032609	LOC100154071	mRNA	1.72612	9.4e-08	4.01e-07
ENSSSCG00000032612	MILR1	mRNA	1.78181	0.008008	0.018287
ENSSSCG00000032613	SNAI1	mRNA	1.03315	3.42e-15	2.32e-14
ENSSSCG00000032691	ANKRD66	mRNA	2.18621	0.0018	0.004664
ENSSSCG00000032710	E2F2	mRNA	1.38306	1.19e-07	5.01e-07
ENSSSCG00000032722	GLRB	mRNA	2.33821	0.002995	0.007441
ENSSSCG00000032777	CXCL9	mRNA	1.60124	0.011405	0.025104
ENSSSCG00000032849	MLPH	mRNA	1.0581	9.15e-06	3.25e-05
ENSSSCG00000032852	FAM167A	mRNA	1.73875	0.000281	0.000832
ENSSSCG00000032857	S100A12	mRNA	2.99356	8.23e-23	7.59e-22
ENSSSCG00000032946	HMGN5	mRNA	1.11582	0.002427	0.00613
ENSSSCG00000032950	SLC25A34	mRNA	-1.02952	0	0
ENSSSCG00000033003	WFDC2	mRNA	1.69435	0.013004	0.02826
ENSSSCG00000033051	POLE	mRNA	1.05281	0.000115	0.000359
ENSSSCG00000033056	LOC100625635	mRNA	-1.08526	0.00094	0.002555
ENSSSCG00000033065	LOC100621389	mRNA	1.21791	4.86e-11	2.6e-10
ENSSSCG00000033179	LOC110258345	mRNA	4.68644	0.000264	0.000783
ENSSSCG00000033183	MCEMP1	mRNA	4.71672	0.000223	0.000671
ENSSSCG00000033191	BEAN1	mRNA	-2.30565	0.016857	0.035649
ENSSSCG00000033193	TPO	mRNA	5.33821	3.28e-06	1.22e-05
ENSSSCG00000033214	GNMT	mRNA	1.04228	6.02e-06	2.18e-05
ENSSSCG00000033238	NLRP1	mRNA	1.16828	0.003015	0.007483
ENSSSCG00000033251	TREM1	mRNA	1.51878	0.017996	0.037763
ENSSSCG00000033259	ARMH1	mRNA	2.54471	5.12e-58	9.97e-57
ENSSSCG00000033307	GNG4	mRNA	1.99425	4.71e-29	5.35e-28
ENSSSCG00000033314	DLX6	mRNA	3.60124	0.02018	0.041762
ENSSSCG00000033333	FER1L6	mRNA	-3.68416	0.000606	0.0017
ENSSSCG00000033637	C13H3orf52	mRNA	1.21791	0.020089	0.041632
ENSSSCG00000033778	LOC100517340	mRNA	-1.42429	0.017755	0.037308
ENSSSCG00000033787	LOC110256626	mRNA	1.25553	8.97e-22	7.98e-21
ENSSSCG00000033993	PLCXD3	mRNA	1.01895	0.000718	0.001986
ENSSSCG00000034044	RASD1	mRNA	2.97975	5.28e-151	2.33e-149
ENSSSCG00000034120	CDKN2B	mRNA	1.88301	1.45e-07	6.08e-07
ENSSSCG00000034293	ARL4C	mRNA	1.03078	2.06e-09	9.94e-09
ENSSSCG00000034328	SP7	mRNA	4.11582	3.1e-53	5.62e-52
ENSSSCG00000034363	LOC100156674	mRNA	3.27931	0.001561	0.00409
ENSSSCG00000034429	PLA2G5	mRNA	3.33821	0.003619	0.008822
ENSSSCG00000034442	LOC100624891	mRNA	-1.98372	0.017237	0.036345
ENSSSCG00000034604	CLEC3A	mRNA	5.01628	1.34e-16	9.77e-16
ENSSSCG00000034623	ADAM2	mRNA	-3.56868	0.021336	0.043927
ENSSSCG00000034686	FAM19A2	mRNA	-2.79642	0.00562	0.013241
ENSSSCG00000034728	RNF151	mRNA	1.45685	0.015313	0.03274
ENSSSCG00000034776	FAM19A5	mRNA	-1.11758	6.33e-05	0.000204
ENSSSCG00000034942	STAR	mRNA	-1.98372	2.86e-20	2.41e-19
ENSSSCG00000034943	GDF6	mRNA	-2.0992	0.010135	0.02256
ENSSSCG00000034987	IQANK1	mRNA	-1.85819	0.002021	0.005179
ENSSSCG00000035037	SIK1	mRNA	1.26661	0	0
ENSSSCG00000035101	KLF5	mRNA	1.93498	1.31e-168	6.3e-167
ENSSSCG00000035222	CHST8	mRNA	1.35508	0.000553	0.001562
ENSSSCG00000035256	SPN	mRNA	1.2061	2.04e-16	1.47e-15
ENSSSCG00000035261	LOC102161782	mRNA	1.17614	3.95e-20	3.3e-19
ENSSSCG00000035276	GAPT	mRNA	2.82363	0.001455	0.003836
ENSSSCG00000035377	LOC102163838	mRNA	3.79764	7.58e-13	4.5e-12
ENSSSCG00000035403	RFX2	mRNA	1.3028	1.75e-42	2.66e-41
ENSSSCG00000035602	GPR88	mRNA	-1.49829	0.011535	0.025371
ENSSSCG00000035644	LOC110261664	mRNA	1.6679	5.62e-49	9.51e-48
ENSSSCG00000035774	ERRFI1	mRNA	1.07537	1.62e-159	7.48e-158
ENSSSCG00000035933	MAPK15	mRNA	2.82363	0.024378	0.049546
ENSSSCG00000035935	C13H3orf80	mRNA	-1.31556	1.22e-05	4.28e-05
ENSSSCG00000035938	DBX2	mRNA	-2.1468	0.002231	0.005672
ENSSSCG00000035940	SPSB1	mRNA	1.12469	4.89e-89	1.37e-87
ENSSSCG00000036013	LOC100302368	mRNA	1.82102	0.002193	0.005585
ENSSSCG00000036060	RRAD	mRNA	1.99444	0	0
ENSSSCG00000036109	BIRC7	mRNA	3.82363	0.000289	0.000853
ENSSSCG00000036135	COL1A1	mRNA	2.19735	0	0
ENSSSCG00000036191	SLC17A2	mRNA	5.83595	2.94e-08	1.3e-07
ENSSSCG00000036207	GPRC6A	mRNA	-1.07272	2.49e-06	9.39e-06
ENSSSCG00000036527	DNASE1	mRNA	1.21987	2.74e-85	7.39e-84
ENSSSCG00000036883	FABP3	mRNA	-1.04627	0	0
ENSSSCG00000036914	CUNH9orf116	mRNA	1.15764	5.53e-05	0.00018
ENSSSCG00000037066	GADD45A	mRNA	2.0613	0	0
ENSSSCG00000037168	TMEM92	mRNA	3.60124	0.02018	0.041762
ENSSSCG00000037177	C2CD4C	mRNA	2.95488	2.99e-05	0.0001
ENSSSCG00000037225	RPRM	mRNA	-1.96969	1.72e-64	3.71e-63
ENSSSCG00000037241	RGS2	mRNA	1.42608	1.7e-103	5.45e-102
ENSSSCG00000037252	LOC110259107	mRNA	1.79364	0.001173	0.00314
ENSSSCG00000037292	PLA2G4E	mRNA	1.24563	1.26e-17	9.57e-17
ENSSSCG00000037401	LOC100522411	mRNA	-1.51423	0.003699	0.009002
ENSSSCG00000037452	HTR2A	mRNA	1.16828	0.003015	0.007483
ENSSSCG00000037475	LOC100154047	mRNA	4.04013	5.66e-12	3.2e-11
ENSSSCG00000037514	BMP8B	mRNA	6.15276	2.46e-18	1.92e-17
ENSSSCG00000037547	SLC17A3	mRNA	2.44389	0.009882	0.022067
ENSSSCG00000037554	FUT7	mRNA	1.45685	0.015313	0.03274
ENSSSCG00000037579	PPBP	mRNA	2.11097	0.003003	0.007457
ENSSSCG00000037735	HCAR2	mRNA	1.75325	0.004453	0.010685
ENSSSCG00000037856	EDN2	mRNA	2.82363	0.024378	0.049546
ENSSSCG00000037867	TAL2	mRNA	2.07517	2.81e-18	2.18e-17
ENSSSCG00000037878	AHSP	mRNA	1.10374	0.001375	0.003642
ENSSSCG00000037922	LOC100621834	mRNA	1.26374	0.003148	0.007777
ENSSSCG00000037938	LOC100620620	mRNA	3.01628	0.012907	0.028106
ENSSSCG00000038226	LOC100624648	mRNA	-1.05157	2.05e-92	5.91e-91
ENSSSCG00000038461	LOC100154902	mRNA	-1.47848	0.001846	0.004772
ENSSSCG00000038543	CENPA	mRNA	2.23867	0.005217	0.01235
ENSSSCG00000038562	RND1	mRNA	1.96114	1.73e-09	8.39e-09
ENSSSCG00000038600	PRSS8	mRNA	3.94762	4.87e-126	1.87e-124
ENSSSCG00000038627	ADAMTS18	mRNA	-1.14126	0.000491	0.001398
ENSSSCG00000038671	TNFRSF6B	mRNA	1.19778	0.000235	0.000703
ENSSSCG00000038677	GJB3	mRNA	-2.39876	0.001971	0.005062
ENSSSCG00000038685	MPPED1	mRNA	-2.30565	0.003423	0.008387
ENSSSCG00000038688	PGLYRP1	mRNA	3.31065	2.49e-68	5.62e-67
ENSSSCG00000038838	DLX5	mRNA	4.01628	8.25e-05	0.000263
ENSSSCG00000038848	IL22RA1	mRNA	2.4086	0.000352	0.001026
ENSSSCG00000038879	RELB	mRNA	1.03604	1.45e-68	3.28e-67
ENSSSCG00000038905	MSMP	mRNA	-2.37604	0.000422	0.001218
ENSSSCG00000038929	CEMIP	mRNA	5.52935	3.77e-99	1.15e-97
ENSSSCG00000038965	ARC	mRNA	5.8331	1.5e-255	1.06e-253
ENSSSCG00000039013	NOTUM	mRNA	2.01628	0.015491	0.033063
ENSSSCG00000039112	HIST1H3E	mRNA	1.28829	4.63e-12	2.63e-11
ENSSSCG00000039141	LOC110258988	mRNA	3.01628	0.012907	0.028106
ENSSSCG00000039204	SOST	mRNA	6.63099	4.8e-13	2.89e-12
ENSSSCG00000039218	SLC38A8	mRNA	-1.04426	0.000274	0.000812
ENSSSCG00000039222	BASP1	mRNA	1.05407	2.26e-17	1.69e-16
ENSSSCG00000039252	TCN1	mRNA	4.22573	1.24e-09	6.1e-09
ENSSSCG00000039270	TREM2	mRNA	-2.98372	0.013914	0.030026
ENSSSCG00000039315	SOX10	mRNA	-1.33479	7.14e-09	3.31e-08
ENSSSCG00000039370	FAM72A	mRNA	4.33821	0.001475	0.003883
ENSSSCG00000039419	SLCO4A1	mRNA	2.82363	3.68e-90	1.04e-88
ENSSSCG00000039526	LOC100515302	mRNA	1.62509	2.79e-11	1.51e-10
ENSSSCG00000039626	DERL3	mRNA	1.16312	0.009267	0.020861
ENSSSCG00000039677	CHRNA4	mRNA	1.51878	0.017996	0.037763
ENSSSCG00000039745	HMOX1	mRNA	1.39341	8.41e-107	2.77e-105
ENSSSCG00000039758	LOC110256379	mRNA	2.33821	4.64e-17	3.43e-16
ENSSSCG00000039761	MYCL	mRNA	1.98048	1.98e-22	1.8e-21
ENSSSCG00000039864	KLC3	mRNA	4.33821	0.001475	0.003883
ENSSSCG00000039956	LOC100622460	mRNA	2.44272	0.000341	0.000998
ENSSSCG00000039962	HSPB1	mRNA	1.26821	0	0
ENSSSCG00000039986	RGS8	mRNA	1.21422	1.69e-07	7.04e-07
ENSSSCG00000039994	ACTRT3	mRNA	1.69435	0.013004	0.02826
ENSSSCG00000040025	NANOS1	mRNA	1.91042	0	0
ENSSSCG00000040066	TRIM58	mRNA	4.26421	1.28e-05	4.48e-05
ENSSSCG00000040080	PTGDS	mRNA	2.08634	2.49e-100	7.67e-99
ENSSSCG00000040260	LOC110259862	mRNA	-1.98372	0.005959	0.013984
ENSSSCG00000040278	IFITM5	mRNA	5.87426	1.93e-15	1.33e-14
ENSSSCG00000040288	ARNT2	mRNA	1.00155	1.09e-05	3.84e-05
ENSSSCG00000040321	LOC100516587	mRNA	-1.84591	1.99e-42	3.01e-41
ENSSSCG00000040355	TICRR	mRNA	1.16312	0.009267	0.020861
ENSSSCG00000040445	RND3	mRNA	1.01903	1.26e-82	3.31e-81
ENSSSCG00000040461	CDKN1C	mRNA	2.42683	0	0
ENSSSCG00000040493	LOC110257684	mRNA	4.00178	0.005659	0.013328
ENSSSCG00000040513	AQP3	mRNA	1.12351	1.1e-64	2.38e-63
ENSSSCG00000040575	ISG15	mRNA	2.04547	3.42e-72	8.1e-71
ENSSSCG00000040622	LOC100621538	mRNA	2.99327	9.04e-106	2.96e-104
ENSSSCG00000040648	CCL8	mRNA	2.82363	0.024378	0.049546
ENSSSCG00000040707	RASEF	mRNA	1.29639	0.002998	0.007447
ENSSSCG00000040714	RSPH6A	mRNA	1.60418	0.003084	0.007636
ENSSSCG00000040770	LOC100153915	mRNA	4.97048	9.01e-09	4.14e-08
ENSSSCG00000040815	DUSP5	mRNA	1.66836	2.51e-14	1.63e-13
ENSSSCG00000040826	LOC110258709	mRNA	1.8856	0.019903	0.041298
NO_INFO	LOC110261290	mRNA	-6.59843	6.23e-13	3.73e-12
NO_INFO	LOC102159001	mRNA	-5.38835	1.9e-06	7.22e-06
NO_INFO	KHDC3L	mRNA	-4.68416	0.000247	0.000735
NO_INFO	LOC110258163	mRNA	-3.26211	0.002949	0.007337
NO_INFO	LOC100511764	mRNA	-2.89061	0.000914	0.002489
NO_INFO	LOC102159737	mRNA	-2.83496	0.016423	0.034826
NO_INFO	LOC110258210	mRNA	-2.44976	0.009588	0.021487
NO_INFO	LOC106507526	mRNA	-2.44315	0.009503	0.021324
NO_INFO	LOC110256092	mRNA	-2.40933	2.46e-07	1.01e-06
NO_INFO	LOC110257074	mRNA	-2.30565	0.016857	0.035649
NO_INFO	LOC100736962	mRNA	-2.1129	3.04e-07	1.24e-06
NO_INFO	LOC110258596	mRNA	-1.95796	0.000166	0.000508
NO_INFO	PLCD4	mRNA	-1.8995	3.22e-106	1.06e-104
NO_INFO	UBL4B	mRNA	-1.89061	0.009908	0.022112
NO_INFO	LOC110255596	mRNA	-1.79107	0.01633	0.034663
NO_INFO	LOC110258214	mRNA	-1.77729	0	0
NO_INFO	LOC110261338	mRNA	-1.70511	0.000107	0.000337
NO_INFO	LOC110261162	mRNA	-1.68879	1.19e-28	1.34e-27
NO_INFO	ARTN	mRNA	-1.64668	0.008358	0.019016
NO_INFO	LOC110258212	mRNA	-1.62039	0.006105	0.014291
NO_INFO	LOC110259831	mRNA	-1.61175	0.000513	0.001455
NO_INFO	LOC106505210	mRNA	-1.56868	0.000456	0.001307
NO_INFO	PRR35	mRNA	-1.48622	6.08e-05	0.000197
NO_INFO	LOC106505794	mRNA	-1.47469	0.003343	0.008212
NO_INFO	SHISA6	mRNA	-1.46177	0.000534	0.00151
NO_INFO	SPACA7	mRNA	-1.44315	0.009985	0.022273
NO_INFO	LOC110256824	mRNA	-1.4249	0.014404	0.030996
NO_INFO	LOC100513119	mRNA	-1.41974	0.002115	0.005405
NO_INFO	LOC100522230	mRNA	-1.40998	0.000401	0.00116
NO_INFO	LOC102158190	mRNA	-1.39075	0.001642	0.004286
NO_INFO	LOC102166811	mRNA	-1.35569	0.000511	0.00145
NO_INFO	PRG4	mRNA	-1.32476	2.22e-10	1.15e-09
NO_INFO	LOC110255598	mRNA	-1.24675	0.016165	0.034352
NO_INFO	LOC110256158	mRNA	-1.20611	0.004659	0.011138
NO_INFO	SYCP2L	mRNA	-1.19784	0.000291	0.00086
NO_INFO	LOC110258920	mRNA	-1.17695	0.012421	0.027142
NO_INFO	CCDC17	mRNA	-1.17636	6.96e-07	2.75e-06
NO_INFO	CLEC20A	mRNA	-1.14599	0.001642	0.004287
NO_INFO	LOC110255313	mRNA	-1.14547	9.67e-05	0.000305
NO_INFO	LOC110258507	mRNA	-1.14374	0.001851	0.004785
NO_INFO	LOC102160997	mRNA	-1.13951	2.58e-07	1.06e-06
NO_INFO	LOC102162293	mRNA	-1.113	0.007961	0.018204
NO_INFO	SHBG	mRNA	-1.11148	0.000578	0.001625
NO_INFO	LOC106506286	mRNA	-1.09334	0.004639	0.011093
NO_INFO	TMEM89	mRNA	-1.08907	0.000204	0.000619
NO_INFO	LOC110260350	mRNA	-1.04286	0.000242	0.000721
NO_INFO	LOC110260108	mRNA	-1.04022	0	0
NO_INFO	LOC102162264	mRNA	-1.02838	4.5e-10	2.27e-09
NO_INFO	NCMAP	mRNA	-1.02614	6.81e-10	3.4e-09
NO_INFO	LOC106504180	mRNA	-1.02325	0.010841	0.023966
NO_INFO	PCARE	mRNA	-1.01409	4.63e-05	0.000152
NO_INFO	LOC110260567	mRNA	-1.01381	5.24e-63	1.1e-61
NO_INFO	LOC110256161	mRNA	-1.00263	0.022437	0.046003
NO_INFO	LOC106510524	mRNA	1.01543	0.014689	0.03155
NO_INFO	LOC100524336	mRNA	1.01628	0.000552	0.001559
NO_INFO	LOC106508817	mRNA	1.04556	8.4e-05	0.000267
NO_INFO	LOC110261671	mRNA	1.11089	6.29e-12	3.55e-11
NO_INFO	SPATS1	mRNA	1.12062	0.002936	0.007308
NO_INFO	TIGD4	mRNA	1.12392	1.87e-08	8.37e-08
NO_INFO	LOC110257943	mRNA	1.12928	0.002072	0.005302
NO_INFO	LOC110261410	mRNA	1.15879	7.57e-21	6.49e-20
NO_INFO	LOC106507970	mRNA	1.16969	6.66e-16	4.69e-15
NO_INFO	TM4SF19	mRNA	1.19738	0.003106	0.007685
NO_INFO	LOC100513562	mRNA	1.19789	3.96e-06	1.46e-05
NO_INFO	ZNF883	mRNA	1.23867	0.024382	0.049515
NO_INFO	LOC106509717	mRNA	1.27939	5.09e-10	2.56e-09
NO_INFO	CCDC88B	mRNA	1.28808	4.67e-07	1.88e-06
NO_INFO	LOC106506033	mRNA	1.33821	0.002029	0.005197
NO_INFO	LOC100621844	mRNA	1.37965	0.023459	0.047891
NO_INFO	CCDC112	mRNA	1.43132	0.007157	0.016514
NO_INFO	L3MBTL1	mRNA	1.43582	1.25e-08	5.71e-08
NO_INFO	LOC100736720	mRNA	1.51878	0.017996	0.037763
NO_INFO	LRRTM4	mRNA	1.54353	4.82e-05	0.000158
NO_INFO	GRXCR2	mRNA	1.55685	0.000949	0.002577
NO_INFO	STPG4	mRNA	1.57235	3.6e-80	9.19e-79
NO_INFO	DCAF16	mRNA	1.60822	0.000572	0.001608
NO_INFO	LOC110261142	mRNA	1.6863	9.6e-82	2.5e-80
NO_INFO	LCN15	mRNA	1.70078	2.96e-05	9.94e-05
NO_INFO	LOC102163231	mRNA	1.71672	8.81e-51	1.53e-49
NO_INFO	LOC100627836	mRNA	1.71672	0.023852	0.048603
NO_INFO	LOC100153205	mRNA	1.72244	0.019187	0.039995
NO_INFO	LOC110256045	mRNA	1.78181	0.008008	0.018287
NO_INFO	LOC110258824	mRNA	1.8051	0.001484	0.003905
NO_INFO	LOC110261735	mRNA	1.81379	1.03e-45	1.64e-44
NO_INFO	BGIG9823_27410	mRNA	1.81886	0.016263	0.034541
NO_INFO	LOC110260879	mRNA	1.83507	1.72e-138	7.15e-137
NO_INFO	LOC110259059	mRNA	1.8394	8.26e-06	2.95e-05
NO_INFO	LOC110256108	mRNA	1.8447	9.07e-163	4.23e-161
NO_INFO	LOC110256592	mRNA	1.92317	0.008705	0.01973
NO_INFO	LOC445536	mRNA	1.96317	1.95e-05	6.7e-05
NO_INFO	XIRP1	mRNA	2.0121	0	0
NO_INFO	LOC102165571	mRNA	2.01628	0.000218	0.000656
NO_INFO	TPBGL	mRNA	2.01628	0.005187	0.012289
NO_INFO	LOC106507364	mRNA	2.03734	5.1e-09	2.39e-08
NO_INFO	LOC106510322	mRNA	2.05728	1.27e-07	5.36e-07
NO_INFO	LOC100038329	mRNA	2.08466	1.15e-20	9.76e-20
NO_INFO	LOC110260492	mRNA	2.10374	0.003067	0.007596
NO_INFO	ADM2	mRNA	2.13176	0.009026	0.020375
NO_INFO	LOC110256817	mRNA	2.14852	0.000772	0.002126
NO_INFO	LOC100153093	mRNA	2.18621	0.0018	0.004664
NO_INFO	LOC110257715	mRNA	2.44996	0.000429	0.001235
NO_INFO	LOC100627067	mRNA	2.45015	1.66e-273	1.25e-271
NO_INFO	C2H11orf96	mRNA	2.48253	0	0
NO_INFO	LOC100525582	mRNA	2.48379	0.003611	0.008807
NO_INFO	LOC110258822	mRNA	2.49828	5.06e-17	3.74e-16
NO_INFO	LOC100152327	mRNA	2.57443	8.85e-182	4.56e-180
NO_INFO	LOC100125542	mRNA	2.58466	3.38e-37	4.59e-36
NO_INFO	LOC100038328	mRNA	2.59522	0.004916	0.011695
NO_INFO	LOC102160869	mRNA	2.64431	9.2e-22	8.18e-21
NO_INFO	NRGN	mRNA	2.64855	4.64e-06	1.7e-05
NO_INFO	APCDD1L	mRNA	2.67924	4.11e-10	2.09e-09
NO_INFO	LOC100517188	mRNA	2.67924	0.000308	0.000907
NO_INFO	LOC110260888	mRNA	2.69435	2.64e-06	9.95e-06
NO_INFO	CNTD1	mRNA	2.82363	0.024378	0.049546
NO_INFO	LOC110258825	mRNA	2.87474	2.69e-06	1.01e-05
NO_INFO	LOC106507543	mRNA	2.92957	3.17e-20	2.66e-19
NO_INFO	FAM155A	mRNA	3.18621	0.006833	0.01583
NO_INFO	MEIKIN	mRNA	3.18621	0.006833	0.01583
NO_INFO	LOC110258713	mRNA	3.25964	0.005068	0.01203
NO_INFO	LOC110255221	mRNA	3.27267	1.92e-13	1.19e-12
NO_INFO	LOC110259119	mRNA	3.5461	0.001355	0.003592
NO_INFO	LOC110261576	mRNA	3.57108	3.72e-86	1.01e-84
NO_INFO	LOC100524118	mRNA	3.60124	0.001019	0.002755
NO_INFO	HYPM	mRNA	3.60124	0.02018	0.041762
NO_INFO	LOC106507601	mRNA	3.60124	0.02018	0.041762
NO_INFO	LOC106507712	mRNA	3.66713	0.000465	0.00133
NO_INFO	LOC102159373	mRNA	3.9271	5.23e-27	5.59e-26
NO_INFO	C3H2orf16	mRNA	4.06067	1.4e-08	6.36e-08
NO_INFO	LOC100520757	mRNA	4.25354	0.002126	0.005428
NO_INFO	LOC110257013	mRNA	4.26269	0.002045	0.005235
NO_INFO	LOC110261647	mRNA	4.34928	0	0
NO_INFO	LOC100625180	mRNA	4.35286	5.46e-104	1.76e-102
NO_INFO	LOC100524147	mRNA	4.40997	0.001066	0.002867
NO_INFO	LOC110259262	mRNA	4.45283	1.52e-55	2.87e-54
NO_INFO	LOC110261552	mRNA	4.60124	0.000416	0.001201
NO_INFO	LOC110259820	mRNA	5.10374	1.94e-05	6.67e-05
NO_INFO	LOC100524318	mRNA	5.20215	9.49e-06	3.37e-05
NO_INFO	LOC110256441	mRNA	5.7878	9.08e-53	1.64e-51
NO_INFO	MEPE	mRNA	5.87426	1.93e-15	1.33e-14
NO_INFO	LOC102160833	mRNA	5.89892	1.12e-15	7.8e-15
NO_INFO	LOC102158400	mRNA	5.92317	1.11e-08	5.05e-08
NO_INFO	LOC102161780	mRNA	7.32006	2.37e-19	1.92e-18
NO_INFO	C12H17orf47	mRNA	8.53395	0	0
NO_INFO	LOC100525692	mRNA	-4.31246	1.05e-19	8.63e-19
NO_INFO	NLRP5	mRNA	-2.98372	0.013914	0.030026
NO_INFO	SHANK2	mRNA	-2.30565	0.016857	0.035649
NO_INFO	ZNF425	mRNA	-2.30565	0.016857	0.035649
NO_INFO	GJD3	mRNA	-2.0992	0.010135	0.02256
NO_INFO	LOC100518097	mRNA	-1.81183	0.02356	0.048065
NO_INFO	CAPN11	mRNA	-1.66179	0.014854	0.031868
NO_INFO	GPC5	mRNA	-1.61175	0.000513	0.001455
NO_INFO	POM121L2	mRNA	-1.49273	0.000612	0.001713
NO_INFO	NYX	mRNA	-1.41053	1.4e-22	1.28e-21
NO_INFO	LY49	mRNA	-1.37604	0.015177	0.032494
NO_INFO	FMN2	mRNA	-1.24675	0.003222	0.007941
NO_INFO	COL4A3	mRNA	-1.23748	2.51e-06	9.49e-06
NO_INFO	LOC100521785	mRNA	-1.21818	0.002296	0.005827
NO_INFO	DGLUCY	mRNA	-1.19317	0.003918	0.0095
NO_INFO	MPZ	mRNA	-1.17113	6.5e-73	1.55e-71
NO_INFO	LOC102157773	mRNA	-1.13182	9.96e-13	5.87e-12
NO_INFO	PRCD	mRNA	-1.04673	6.68e-11	3.55e-10
NO_INFO	RASSF10	mRNA	-1.02142	6.85e-27	7.29e-26
NO_INFO	SORCS1	mRNA	-1.00797	5.85e-06	2.13e-05
NO_INFO	KCNA3	mRNA	1.01628	3.72e-06	1.38e-05
NO_INFO	CYP3A29	mRNA	1.0446	8.28e-21	7.08e-20
NO_INFO	KERA	mRNA	1.04776	4.11e-07	1.66e-06
NO_INFO	LOC100156127	mRNA	1.05206	0.000173	0.000529
NO_INFO	TREML2	mRNA	1.0581	0.010426	0.023132
NO_INFO	SLA-DOA	mRNA	1.07272	4.83e-18	3.72e-17
NO_INFO	MYC	mRNA	1.07363	3.57e-80	9.11e-79
NO_INFO	LOC110261478	mRNA	1.08582	8.16e-09	3.77e-08
NO_INFO	LOC100515345	mRNA	1.132	0.000139	0.00043
NO_INFO	LOC100158003	mRNA	1.15626	0	0
NO_INFO	LOC100626199	mRNA	1.18579	4.45e-184	2.32e-182
NO_INFO	RDH16	mRNA	1.22639	8.05e-85	2.16e-83
NO_INFO	LOC100154508	mRNA	1.23129	8.09e-05	0.000257
NO_INFO	UBD	mRNA	1.2451	1.94e-05	6.67e-05
NO_INFO	LOC100512420	mRNA	1.26953	0.005635	0.013274
NO_INFO	OAS1	mRNA	1.2785	2.37e-21	2.07e-20
NO_INFO	CDK5R1	mRNA	1.31513	1.48e-10	7.7e-10
NO_INFO	CAPNS2	mRNA	1.3497	3.08e-05	0.000103
NO_INFO	FYB1	mRNA	1.35732	4.29e-06	1.58e-05
NO_INFO	LOC110261670	mRNA	1.38106	1.58e-20	1.34e-19
NO_INFO	CR1	mRNA	1.39479	0.006048	0.014176
NO_INFO	ANKLE1	mRNA	1.49021	6.32e-05	0.000204
NO_INFO	LOC100156932	mRNA	1.4938	5.43e-09	2.54e-08
NO_INFO	CNGB1	mRNA	1.536	3.07e-22	2.78e-21
NO_INFO	LOC100513644	mRNA	1.54603	0.003574	0.008722
NO_INFO	LOC110261661	mRNA	1.55295	3.88e-19	3.11e-18
NO_INFO	CITED4	mRNA	1.61755	9.64e-23	8.88e-22
NO_INFO	GPR152	mRNA	1.62701	1.43e-10	7.48e-10
NO_INFO	HSP70.2	mRNA	1.65442	0	0
NO_INFO	FAT3	mRNA	1.66774	1.52e-56	2.9e-55
NO_INFO	HOOK1	mRNA	1.67925	0.007158	0.016513
NO_INFO	LOC110255273	mRNA	1.71696	2.86e-178	1.43e-176
NO_INFO	RAB33A	mRNA	1.75325	0.000495	0.00141
NO_INFO	MNX1	mRNA	1.78181	0.008008	0.018287
NO_INFO	LOC100739707	mRNA	1.81631	0.001242	0.003311
NO_INFO	FAM84A	mRNA	1.87269	3.28e-68	7.38e-67
NO_INFO	MARCKSL1	mRNA	1.89075	1.03e-100	3.19e-99
NO_INFO	LOC100620827	mRNA	2.00421	3.12e-14	2.01e-13
NO_INFO	GZMH	mRNA	2.01628	0.015491	0.033063
NO_INFO	COL24A1	mRNA	2.21422	8.03e-30	9.34e-29
NO_INFO	RHAG	mRNA	2.33821	0.000609	0.001707
NO_INFO	LOC100512905	mRNA	2.47014	0.017346	0.03655
NO_INFO	LOC110261672	mRNA	2.669	3.11e-07	1.27e-06
NO_INFO	PADI4	mRNA	2.78567	2.53e-13	1.55e-12
NO_INFO	LOC110260994	mRNA	2.80538	6.19e-07	2.45e-06
NO_INFO	LOC100512976	mRNA	2.82363	0.024378	0.049546
NO_INFO	COL22A1	mRNA	2.84971	3.54e-55	6.63e-54
NO_INFO	HSPA6	mRNA	2.8681	0	0
NO_INFO	BGLAP	mRNA	3.12898	2.3e-122	8.52e-121
NO_INFO	HS3ST3A1	mRNA	3.17399	0.001205	0.003216
NO_INFO	ZDHHC22	mRNA	3.18621	0.006833	0.01583
NO_INFO	LOC396781	mRNA	3.24331	0	0
NO_INFO	LOC100522201	mRNA	3.58252	5.53e-306	4.68e-304
NO_INFO	WNT1	mRNA	3.60124	0.001019	0.002755
NO_INFO	GFI1B	mRNA	3.71672	0.000542	0.001533
NO_INFO	LOC100525112	mRNA	4.14391	0.003318	0.008158
NO_INFO	LOC100157763	mRNA	4.26421	1.28e-05	4.48e-05
NO_INFO	SSTR2	mRNA	4.82364	0.00012	0.000375
NO_INFO	PMAP-36	mRNA	4.98621	4.34e-05	0.000143
NO_INFO	LOC100520680	mRNA	5.06067	7.27e-25	7.2e-24
NO_INFO	SIGLEC15	mRNA	5.84917	3.35e-15	2.28e-14
NO_INFO	COL9A1	mRNA	6.33821	5.05e-11	2.7e-10
NO_INFO	LOC100624086	mRNA	7.96826	6.29e-28	6.9e-27
102000000	LOC102163618	lncRNA	-4.31857	0.001513	0.003973
110000000	LOC110260912	lncRNA	-4.15364	0.003025	0.007505
BGIG9823_26323	BGIG9823_26323	lncRNA	-3.98372	0.005757	0.013539
110000000	LOC110258480	lncRNA	-3.94904	0.006511	0.01516
107000000	LOC106506864	lncRNA	-3.79107	0.011037	0.024359
110000000	LOC110258991	lncRNA	-3.60899	0.019063	0.039755
110000000	LOC110261649	lncRNA	-3.56868	0.021336	0.043927
110000000	LOC110258391	lncRNA	-3.51587	0.023231	0.047473
110000000	LOC110260609	lncRNA	-3.44315	0.002116	0.005406
102000000	LOC102167422	lncRNA	-3.44315	0.002116	0.005406
BGIG9823_27112	BGIG9823_27112	lncRNA	-3.44315	0.002116	0.005406
107000000	LOC106507757	lncRNA	-3.23165	8.4e-05	0.000267
110000000	LOC110261467	lncRNA	-3.15364	0.007423	0.01708
107000000	LOC106510103	lncRNA	-3.15364	0.007423	0.01708
110000000	LOC110256555	lncRNA	-2.98372	2.04e-05	7e-05
102000000	LOC102167686	lncRNA	-2.98372	0.013914	0.030026
110000000	LOC110260601	lncRNA	-2.98372	0.013914	0.030026
BGIG9823_26816	BGIG9823_26816	lncRNA	-2.98372	0.013914	0.030026
102000000	LOC102159627	lncRNA	-2.89504	4.74e-80	1.21e-78
110000000	LOC110260791	lncRNA	-2.89061	0.000914	0.002489
110000000	LOC110258139	lncRNA	-2.87602	0.01659	0.035139
110000000	LOC110257461	lncRNA	-2.85819	6.53e-05	0.00021
107000000	LOC106505188	lncRNA	-2.79107	0.00165	0.004306
110000000	LOC110261567	lncRNA	-2.79107	0.00165	0.004306
102000000	LOC102165973	lncRNA	-2.44315	0.009503	0.021324
110000000	LOC110258316	lncRNA	-2.44315	0.009503	0.021324
102000000	LOC102165197	lncRNA	-2.44315	0.009503	0.021324
101000000	LOC100517320	lncRNA	-2.44315	0.009503	0.021324
110000000	LOC110255850	lncRNA	-2.33828	5.43e-12	3.07e-11
107000000	LOC106510575	lncRNA	-2.30565	0.003423	0.008387
107000000	LOC106507094	lncRNA	-2.23165	0.00124	0.003306
107000000	LOC106509306	lncRNA	-2.22473	9.68e-08	4.12e-07
102000000	LOC102162292	lncRNA	-2.21818	4.05e-11	2.18e-10
101000000	LOC100523337	lncRNA	-2.20095	1.4e-12	8.18e-12
110000000	LOC110262046	lncRNA	-2.20004	6.68e-11	3.55e-10
110000000	LOC110256513	lncRNA	-2.13182	2.92e-20	2.45e-19
110000000	LOC110257180	lncRNA	-2.11331	1.17e-200	6.69e-199
107000000	LOC106506344	lncRNA	-2.10401	9.23e-13	5.45e-12
110000000	LOC110255704	lncRNA	-2.0992	0.010135	0.02256
107000000	LOC106507788	lncRNA	-2.0992	0.010135	0.02256
110000000	LOC110257008	lncRNA	-2.07118	0.003555	0.008682
BGIG9823_26783	BGIG9823_26783	lncRNA	-2.07118	0.003555	0.008682
102000000	LOC102167252	lncRNA	-2.05411	0.001269	0.003379
110000000	LOC110260616	lncRNA	-2.04261	0.000459	0.001314
110000000	LOC110259274	lncRNA	-1.98372	0.017237	0.036345
110000000	LOC110260634	lncRNA	-1.95278	3.33e-49	5.65e-48
110000000	LOC110259507	lncRNA	-1.94308	6.02e-05	0.000195
110000000	LOC110256287	lncRNA	-1.94149	9.63e-12	5.38e-11
102000000	LOC102167197	lncRNA	-1.90972	0.003475	0.008504
110000000	LOC110255522	lncRNA	-1.83172	0.005688	0.013388
107000000	LOC106505108	lncRNA	-1.79567	0.015582	0.033223
102000000	LOC102159962	lncRNA	-1.79107	0.000683	0.001898
110000000	LOC110259228	lncRNA	-1.79107	0.01633	0.034663
102000000	LOC102160777	lncRNA	-1.79107	0.01633	0.034663
107000000	LOC106505835	lncRNA	-1.78209	1.06e-08	4.85e-08
107000000	LOC106509546	lncRNA	-1.76133	0.001884	0.00486
110000000	LOC110255965	lncRNA	-1.73861	0.001088	0.002923
110000000	LOC110257740	lncRNA	-1.73861	0.001088	0.002923
110000000	LOC110256990	lncRNA	-1.72069	0.005249	0.012421
110000000	LOC110261782	lncRNA	-1.70619	0.000365	0.001061
102000000	LOC102160100	lncRNA	-1.67404	4.1e-19	3.29e-18
102000000	LOC102166006	lncRNA	-1.66179	0.014854	0.031868
102000000	LOC102161511	lncRNA	-1.66179	0.014854	0.031868
110000000	LOC110259504	lncRNA	-1.65614	1.43e-05	5e-05
BGIG9823_27288	BGIG9823_27288	lncRNA	-1.62758	0.0027	0.00677
107000000	LOC106506426	lncRNA	-1.57122	1.64e-86	4.49e-85
110000000	LOC110255980	lncRNA	-1.56868	2.72e-24	2.65e-23
102000000	LOC102160057	lncRNA	-1.56868	0.023658	0.048254
110000000	LOC110257028	lncRNA	-1.54315	1e-09	4.96e-09
110000000	LOC110256789	lncRNA	-1.51423	0.003699	0.009002
102000000	LOC102158878	lncRNA	-1.5121	3.29e-12	1.88e-11
110000000	LOC110258681	lncRNA	-1.51076	3.64e-06	1.35e-05
107000000	LOC106507293	lncRNA	-1.50398	3.35e-09	1.59e-08
107000000	LOC106510287	lncRNA	-1.49829	0.011535	0.025371
107000000	LOC106509530	lncRNA	-1.46915	0.000309	0.000909
BGIG9823_26339	BGIG9823_26339	lncRNA	-1.46559	5.71e-07	2.27e-06
110000000	LOC110260796	lncRNA	-1.46177	0.000534	0.00151
110000000	LOC110256761	lncRNA	-1.45503	1.59e-05	5.5e-05
102000000	LOC102162974	lncRNA	-1.44315	0.009985	0.022273
107000000	LOC106506869	lncRNA	-1.44315	0.009985	0.022273
107000000	LOC106505322	lncRNA	-1.43744	1.38e-05	4.82e-05
110000000	LOC110259899	lncRNA	-1.42564	2.76e-61	5.63e-60
107000000	LOC106508298	lncRNA	-1.42429	0.017755	0.037308
110000000	LOC110261559	lncRNA	-1.42088	3.52e-17	2.62e-16
107000000	LOC106507304	lncRNA	-1.39876	3.27e-14	2.11e-13
102000000	LOC102160006	lncRNA	-1.39876	0.008582	0.019476
110000000	LOC110258225	lncRNA	-1.39169	9.41e-08	4.01e-07
110000000	LOC110260027	lncRNA	-1.38582	0.001193	0.00319
110000000	LOC110258598	lncRNA	-1.36734	0.007128	0.016462
110000000	LOC110258332	lncRNA	-1.36223	2.03e-09	9.82e-09
110000000	LOC110260731	lncRNA	-1.36223	0.001025	0.002768
107000000	LOC106506313	lncRNA	-1.36223	0.007339	0.016896
102000000	LOC102163669	lncRNA	-1.36223	0.007339	0.016896
110000000	LOC110261540	lncRNA	-1.36223	0.007339	0.016896
102000000	LOC102159064	lncRNA	-1.34127	0.000878	0.002396
110000000	LOC110256316	lncRNA	-1.33422	1.73e-07	7.19e-07
110000000	LOC110255798	lncRNA	-1.33164	0.006252	0.014606
110000000	LOC110256664	lncRNA	-1.33164	0.006252	0.014606
107000000	LOC106506712	lncRNA	-1.30565	0.022847	0.046756
110000000	LOC110257857	lncRNA	-1.29631	8.95e-06	3.19e-05
110000000	LOC110257296	lncRNA	-1.28328	0.004503	0.010797
BGIG9823_26782	BGIG9823_26782	lncRNA	-1.28273	1.05e-06	4.07e-06
110000000	LOC110258138	lncRNA	-1.27659	0.012719	0.027735
102000000	LOC102161394	lncRNA	-1.26912	0.001878	0.004845
110000000	LOC110257253	lncRNA	-1.26383	0.003811	0.009257
BGIG9823_26691	BGIG9823_26691	lncRNA	-1.24876	0	0
107000000	LOC106505119	lncRNA	-1.24281	3.27e-09	1.56e-08
110000000	LOC110260910	lncRNA	-1.21402	0.000173	0.00053
107000000	LOC106504812	lncRNA	-1.19784	0.000291	0.00086
107000000	LOC106510178	lncRNA	-1.19626	9.36e-09	4.29e-08
107000000	LOC106510024	lncRNA	-1.18026	3.63e-22	3.28e-21
102000000	LOC102164930	lncRNA	-1.17636	2.74e-05	9.22e-05
BGIG9823_26749	BGIG9823_26749	lncRNA	-1.17477	5.32e-14	3.39e-13
102000000	LOC102167067	lncRNA	-1.17261	3.5e-21	3.03e-20
BGIG9823_26290	BGIG9823_26290	lncRNA	-1.16936	4.96e-17	3.67e-16
102000000	LOC102167943	lncRNA	-1.16429	0.006691	0.015537
107000000	LOC106506390	lncRNA	-1.14599	0.001642	0.004287
107000000	LOC106505035	lncRNA	-1.14292	0.000176	0.000538
107000000	LOC106504698	lncRNA	-1.13984	5.38e-05	0.000175
110000000	LOC110260631	lncRNA	-1.13494	1.61e-29	1.86e-28
107000000	LOC106506626	lncRNA	-1.12574	0.000293	0.000864
107000000	LOC106509690	lncRNA	-1.12508	8.91e-05	0.000282
BGIG9823_26988	BGIG9823_26988	lncRNA	-1.12455	1.7e-05	5.87e-05
101000000	LOC100514051	lncRNA	-1.1242	0.010515	0.023305
110000000	LOC110257993	lncRNA	-1.11779	2.26e-08	1.01e-07
BGIG9823_26835	BGIG9823_26835	lncRNA	-1.113	0.007961	0.018204
BGIG9823_26370	BGIG9823_26370	lncRNA	-1.113	0.007961	0.018204
110000000	LOC110257551	lncRNA	-1.10925	4.88e-11	2.61e-10
107000000	LOC106506841	lncRNA	-1.0992	0.001364	0.003615
110000000	LOC110257422	lncRNA	-1.09631	2.78e-30	3.26e-29
110000000	LOC110255523	lncRNA	-1.09011	1.48e-10	7.73e-10
107000000	LOC106505895	lncRNA	-1.08907	0.000204	0.000619
102000000	LOC102166684	lncRNA	-1.0846	4.91e-21	4.23e-20
110000000	LOC110260343	lncRNA	-1.08386	1.34e-30	1.59e-29
BGIG9823_26366	BGIG9823_26366	lncRNA	-1.08326	0.016236	0.034489
101000000	LOC100623270	lncRNA	-1.06911	5.13e-05	0.000167
110000000	LOC110255724	lncRNA	-1.06618	0.000237	0.000709
107000000	LOC106505748	lncRNA	-1.06464	0.001333	0.003538
107000000	LOC106505669	lncRNA	-1.05527	1.33e-11	7.38e-11
110000000	LOC110255318	lncRNA	-1.05083	0.004516	0.010825
110000000	LOC110256012	lncRNA	-1.05083	0.004516	0.010825
110000000	LOC110256747	lncRNA	-1.04931	4.98e-05	0.000163
102000000	LOC102164789	lncRNA	-1.03817	0.001841	0.00476
101000000	LOC100622439	lncRNA	-1.03623	2.67e-126	1.03e-124
BGIG9823_27193	BGIG9823_27193	lncRNA	-1.03556	9.63e-05	0.000304
110000000	LOC110255706	lncRNA	-1.03263	0.00108	0.002903
BGIG9823_26819	BGIG9823_26819	lncRNA	-1.02636	2.03e-05	6.95e-05
102000000	LOC102157750	lncRNA	-1.02575	1.35e-19	1.1e-18
110000000	LOC110256028	lncRNA	-1.0179	1.73e-09	8.41e-09
102000000	LOC102161678	lncRNA	-1.01475	0.004346	0.01045
BGIG9823_27028	BGIG9823_27028	lncRNA	-1.0112	1.69e-07	7.05e-07
110000000	LOC110261084	lncRNA	1.01021	1.39e-10	7.28e-10
BGIG9823_26645	BGIG9823_26645	lncRNA	1.01211	4.48e-06	1.65e-05
BGIG9823_27315	BGIG9823_27315	lncRNA	1.01628	0.014592	0.03137
110000000	LOC110256722	lncRNA	1.01628	0.021779	0.044731
110000000	LOC110260924	lncRNA	1.02336	2.44e-41	3.62e-40
110000000	LOC110255587	lncRNA	1.03514	0.00019	0.000579
107000000	LOC106505545	lncRNA	1.04275	0.00151	0.003968
110000000	LOC110261331	lncRNA	1.0581	0.000292	0.000862
100000000	LOC100154249	lncRNA	1.06359	6.2e-08	2.68e-07
BGIG9823_26672	BGIG9823_26672	lncRNA	1.06691	0.018909	0.03947
107000000	LOC106506526	lncRNA	1.0676	1.5e-07	6.27e-07
BGIG9823_26786	BGIG9823_26786	lncRNA	1.07073	0.023114	0.047257
BGIG9823_27139	BGIG9823_27139	lncRNA	1.07177	6.66e-06	2.4e-05
107000000	LOC106506135	lncRNA	1.0834	0.003415	0.00837
110000000	LOC110261767	lncRNA	1.08667	0.000445	0.001278
110000000	LOC110256800	lncRNA	1.08667	0.004139	0.009999
BGIG9823_26839	BGIG9823_26839	lncRNA	1.08667	0.004139	0.009999
110000000	LOC110259925	lncRNA	1.08767	9.73e-08	4.14e-07
110000000	LOC110255436	lncRNA	1.09192	0.000136	0.00042
110000000	LOC110260982	lncRNA	1.10034	0.001139	0.003052
102000000	LOC102164258	lncRNA	1.10287	1.3e-10	6.82e-10
102000000	LOC102160252	lncRNA	1.10462	0.00027	0.000801
BGIG9823_27354	BGIG9823_27354	lncRNA	1.11582	0.013293	0.028815
102000000	LOC102163610	lncRNA	1.1199	5.21e-06	1.9e-05
110000000	LOC110260336	lncRNA	1.1232	1.99e-10	1.03e-09
BGIG9823_27264	BGIG9823_27264	lncRNA	1.1232	0.01619	0.034398
110000000	LOC110261211	lncRNA	1.13176	6.91e-10	3.45e-09
107000000	LOC106504333	lncRNA	1.13951	1.87e-17	1.4e-16
BGIG9823_27251	BGIG9823_27251	lncRNA	1.14752	0.001715	0.004457
110000000	LOC110257902	lncRNA	1.15158	2.76e-07	1.13e-06
110000000	LOC110257241	lncRNA	1.16182	2.13e-11	1.16e-10
BGIG9823_27330	BGIG9823_27330	lncRNA	1.16828	0.003015	0.007483
BGIG9823_26963	BGIG9823_26963	lncRNA	1.1764	0.002865	0.007144
BGIG9823_26889	BGIG9823_26889	lncRNA	1.17674	0.003641	0.008869
BGIG9823_27215	BGIG9823_27215	lncRNA	1.18086	0	0
110000000	LOC110261003	lncRNA	1.19848	0.000237	0.000708
BGIG9823_26452	BGIG9823_26452	lncRNA	1.20221	2.8e-43	4.3e-42
BGIG9823_26525	BGIG9823_26525	lncRNA	1.21183	4.74e-05	0.000155
BGIG9823_26817	BGIG9823_26817	lncRNA	1.21337	0.002543	0.006399
107000000	LOC106510043	lncRNA	1.23867	0.024382	0.049515
107000000	LOC106510129	lncRNA	1.24894	4.34e-09	2.05e-08
110000000	LOC110258913	lncRNA	1.25223	0.01402	0.030221
110000000	LOC110256836	lncRNA	1.25317	0.008713	0.01974
BGIG9823_26838	BGIG9823_26838	lncRNA	1.25729	0.011271	0.024826
110000000	LOC110261044	lncRNA	1.27785	0.002069	0.005294
107000000	LOC106506256	lncRNA	1.27931	0.000483	0.001376
107000000	LOC106508370	lncRNA	1.27931	0.013587	0.029402
110000000	LOC110260295	lncRNA	1.27931	0.013587	0.029402
BGIG9823_26588	BGIG9823_26588	lncRNA	1.2893	0.006346	0.014805
102000000	LOC102162815	lncRNA	1.2986	3.27e-28	3.63e-27
BGIG9823_26634	BGIG9823_26634	lncRNA	1.30168	0.001429	0.003774
107000000	LOC106507667	lncRNA	1.30579	0.01636	0.034702
110000000	LOC110259903	lncRNA	1.30579	0.01636	0.034702
102000000	LOC102158075	lncRNA	1.31001	7.7e-06	2.76e-05
110000000	LOC110260308	lncRNA	1.31174	0.007608	0.017472
110000000	LOC110259473	lncRNA	1.31174	0.007608	0.017472
102000000	LOC102162623	lncRNA	1.31831	4.58e-12	2.61e-11
110000000	LOC110261788	lncRNA	1.31884	1.53e-14	1.01e-13
102000000	LOC102167839	lncRNA	1.31884	2.29e-12	1.33e-11
102000000	LOC102159626	lncRNA	1.33821	5.34e-05	0.000174
110000000	LOC110260434	lncRNA	1.33821	0.019661	0.040859
BGIG9823_27113	BGIG9823_27113	lncRNA	1.33821	0.019661	0.040859
BGIG9823_26983	BGIG9823_26983	lncRNA	1.33821	0.019661	0.040859
BGIG9823_26982	BGIG9823_26982	lncRNA	1.33821	0.019661	0.040859
110000000	LOC110257240	lncRNA	1.36273	1.7e-12	9.94e-12
110000000	LOC110259113	lncRNA	1.3629	2.37e-74	5.74e-73
107000000	LOC106505566	lncRNA	1.3642	0.005093	0.012081
BGIG9823_26755	BGIG9823_26755	lncRNA	1.36992	0.000316	0.000928
BGIG9823_26431	BGIG9823_26431	lncRNA	1.36992	0.01087	0.024024
107000000	LOC106509663	lncRNA	1.37242	2.1e-05	7.17e-05
BGIG9823_26553	BGIG9823_26553	lncRNA	1.38551	0.00286	0.007134
102000000	LOC102161209	lncRNA	1.39479	2.81e-07	1.15e-06
110000000	LOC110261018	lncRNA	1.39479	0.006048	0.014176
BGIG9823_26753	BGIG9823_26753	lncRNA	1.40692	1.93e-15	1.33e-14
110000000	LOC110255527	lncRNA	1.42346	1.96e-05	6.71e-05
110000000	LOC110256743	lncRNA	1.42394	4.52e-10	2.28e-09
102000000	LOC102159645	lncRNA	1.42818	9.03e-22	8.03e-21
BGIG9823_26364	BGIG9823_26364	lncRNA	1.43132	2.81e-14	1.82e-13
110000000	LOC110258078	lncRNA	1.43132	0.0019	0.004898
101000000	LOC100521666	lncRNA	1.43928	3.52e-05	0.000117
107000000	LOC106508808	lncRNA	1.44452	7.55e-14	4.78e-13
BGIG9823_26682	BGIG9823_26682	lncRNA	1.44924	0.003985	0.009653
BGIG9823_26802	BGIG9823_26802	lncRNA	1.44924	0.003985	0.009653
110000000	LOC110258381	lncRNA	1.45533	1.23e-11	6.81e-11
BGIG9823_27306	BGIG9823_27306	lncRNA	1.45685	2.67e-05	9e-05
110000000	LOC110260189	lncRNA	1.45685	0.015313	0.03274
BGIG9823_26614	BGIG9823_26614	lncRNA	1.46374	0.00223	0.00567
BGIG9823_27188	BGIG9823_27188	lncRNA	1.49021	0.004672	0.011162
BGIG9823_26822	BGIG9823_26822	lncRNA	1.49021	0.004672	0.011162
110000000	LOC110261785	lncRNA	1.49545	5.3e-08	2.31e-07
110000000	LOC110257507	lncRNA	1.49741	3.36e-06	1.25e-05
110000000	LOC110257221	lncRNA	1.50171	0.002605	0.006547
107000000	LOC106507446	lncRNA	1.50503	5.57e-14	3.55e-13
BGIG9823_26490	BGIG9823_26490	lncRNA	1.51104	0.00146	0.003847
110000000	LOC110256388	lncRNA	1.51453	1.15e-09	5.68e-09
110000000	LOC110256683	lncRNA	1.51878	0.000821	0.002252
BGIG9823_26451	BGIG9823_26451	lncRNA	1.52246	2.07e-09	9.99e-09
101000000	LOC100519934	lncRNA	1.52724	1.36e-05	4.76e-05
110000000	LOC110257198	lncRNA	1.53085	7.81e-06	2.8e-05
110000000	LOC110259415	lncRNA	1.53085	0.009853	0.022014
BGIG9823_26580	BGIG9823_26580	lncRNA	1.53085	0.009853	0.022014
BGIG9823_26877	BGIG9823_26877	lncRNA	1.53711	5.19e-21	4.48e-20
107000000	LOC106505361	lncRNA	1.53984	0.005441	0.012841
110000000	LOC110261231	lncRNA	1.55233	0.001691	0.004398
BGIG9823_27385	BGIG9823_27385	lncRNA	1.58669	2.03e-66	4.49e-65
110000000	LOC110260305	lncRNA	1.60124	0.006281	0.014667
110000000	LOC110259987	lncRNA	1.60124	0.011405	0.025104
BGIG9823_26742	BGIG9823_26742	lncRNA	1.60124	0.011405	0.025104
102000000	LOC102166855	lncRNA	1.60124	0.02091	0.043144
102000000	LOC102158739	lncRNA	1.62772	2.47e-10	1.27e-09
110000000	LOC110259238	lncRNA	1.63519	7.19e-05	0.000231
107000000	LOC106508380	lncRNA	1.63777	0.000126	0.000393
102000000	LOC102164379	lncRNA	1.65674	1.3e-14	8.62e-14
110000000	LOC110262051	lncRNA	1.66014	0.002214	0.005632
110000000	LOC110261980	lncRNA	1.67925	0.007158	0.016513
110000000	LOC110260712	lncRNA	1.69435	6.79e-07	2.68e-06
BGIG9823_27090	BGIG9823_27090	lncRNA	1.69435	0.013004	0.02826
BGIG9823_26297	BGIG9823_26297	lncRNA	1.70185	5.02e-18	3.86e-17
BGIG9823_27012	BGIG9823_27012	lncRNA	1.71672	9.09e-05	0.000288
107000000	LOC106510131	lncRNA	1.71672	0.023852	0.048603
BGIG9823_26523	BGIG9823_26523	lncRNA	1.71672	0.023852	0.048603
BGIG9823_26649	BGIG9823_26649	lncRNA	1.72658	4.35e-13	2.63e-12
102000000	LOC102163385	lncRNA	1.74211	3.3e-05	0.00011
110000000	LOC110260973	lncRNA	1.75325	6.89e-06	2.48e-05
BGIG9823_26639	BGIG9823_26639	lncRNA	1.76919	3.92e-26	4.07e-25
102000000	LOC102164024	lncRNA	1.77117	0.000875	0.002388
110000000	LOC110255804	lncRNA	1.77117	0.000875	0.002388
BGIG9823_26506	BGIG9823_26506	lncRNA	1.77958	5.64e-25	5.6e-24
BGIG9823_26464	BGIG9823_26464	lncRNA	1.78181	0.008008	0.018287
BGIG9823_26540	BGIG9823_26540	lncRNA	1.78616	8.02e-26	8.2e-25
110000000	LOC110260776	lncRNA	1.79764	1.6e-06	6.12e-06
110000000	LOC110260246	lncRNA	1.80098	1.45e-32	1.82e-31
BGIG9823_27297	BGIG9823_27297	lncRNA	1.80678	5.1e-80	1.3e-78
BGIG9823_26703	BGIG9823_26703	lncRNA	1.82363	0.002748	0.006882
BGIG9823_26647	BGIG9823_26647	lncRNA	1.82363	0.014481	0.031144
BGIG9823_26484	BGIG9823_26484	lncRNA	1.82363	0.014481	0.031144
BGIG9823_26949	BGIG9823_26949	lncRNA	1.84768	4.08e-13	2.47e-12
BGIG9823_27015	BGIG9823_27015	lncRNA	1.87426	0.000337	0.000986
110000000	LOC110257112	lncRNA	1.88301	3.45e-86	9.37e-85
110000000	LOC110256418	lncRNA	1.89075	8.9e-06	3.17e-05
102000000	LOC102167529	lncRNA	1.89892	2.48e-07	1.02e-06
BGIG9823_27060	BGIG9823_27060	lncRNA	1.9161	6.06e-194	3.35e-192
110000000	LOC110260630	lncRNA	1.92317	5.52e-06	2.01e-05
BGIG9823_27099	BGIG9823_27099	lncRNA	1.92317	0.008705	0.01973
101000000	LOC100626258	lncRNA	1.95186	3.82e-91	1.09e-89
110000000	LOC110261000	lncRNA	2.01628	0.000618	0.001731
BGIG9823_26850	BGIG9823_26850	lncRNA	2.01628	0.005187	0.012289
BGIG9823_27014	BGIG9823_27014	lncRNA	2.01628	0.005187	0.012289
107000000	LOC106508088	lncRNA	2.01628	0.015491	0.033063
107000000	LOC106507395	lncRNA	2.01628	0.015491	0.033063
102000000	LOC102163023	lncRNA	2.02717	6.11e-16	4.31e-15
101000000	LOC100624063	lncRNA	2.06542	6.6e-06	2.38e-05
BGIG9823_26513	BGIG9823_26513	lncRNA	2.08667	1.42e-08	6.44e-08
107000000	LOC106510651	lncRNA	2.08667	0.001061	0.002855
107000000	LOC106504504	lncRNA	2.11582	7.89e-05	0.000252
110000000	LOC110256033	lncRNA	2.11582	7.89e-05	0.000252
107000000	LOC106506298	lncRNA	2.13176	0.009026	0.020375
110000000	LOC110257190	lncRNA	2.13176	0.009026	0.020375
110000000	LOC110261096	lncRNA	2.13176	0.009026	0.020375
110000000	LOC110256801	lncRNA	2.13176	0.009026	0.020375
110000000	LOC110258489	lncRNA	2.15378	0.000629	0.001759
102000000	LOC102160820	lncRNA	2.15378	0.000629	0.001759
BGIG9823_26373	BGIG9823_26373	lncRNA	2.16067	4.44e-31	5.36e-30
110000000	LOC110259341	lncRNA	2.18621	2.48e-13	1.52e-12
107000000	LOC106509136	lncRNA	2.19848	0.005468	0.0129
110000000	LOC110261075	lncRNA	2.27931	1.41e-13	8.81e-13
BGIG9823_27120	BGIG9823_27120	lncRNA	2.27931	0.000218	0.000656
110000000	LOC110261764	lncRNA	2.30906	1.01e-07	4.29e-07
110000000	LOC110255394	lncRNA	2.33821	2.66e-29	3.05e-28
107000000	LOC106510067	lncRNA	2.33821	0.015369	0.03284
107000000	LOC106504252	lncRNA	2.33851	0	0
110000000	LOC110260880	lncRNA	2.34571	3.7e-74	8.93e-73
102000000	LOC102167294	lncRNA	2.35613	4.24e-12	2.42e-11
110000000	LOC110257651	lncRNA	2.3628	9.05e-43	1.38e-41
110000000	LOC110258326	lncRNA	2.36626	7.47e-09	3.46e-08
110000000	LOC110255632	lncRNA	2.43132	9.17e-06	3.26e-05
107000000	LOC106507734	lncRNA	2.43132	0.001709	0.004443
107000000	LOC106505960	lncRNA	2.44924	4.28e-05	0.000141
100000000	MEG3	lncRNA	2.45562	0	0
110000000	LOC110261577	lncRNA	2.46771	4.18e-21	3.61e-20
110000000	LOC110260062	lncRNA	2.47571	0.00859	0.019486
BGIG9823_27159	BGIG9823_27159	lncRNA	2.47571	0.00859	0.019486
BGIG9823_27316	BGIG9823_27316	lncRNA	2.47571	0.00859	0.019486
102000000	LOC102165115	lncRNA	2.51878	0.00097	0.00263
BGIG9823_26584	BGIG9823_26584	lncRNA	2.53984	4.97e-08	2.17e-07
110000000	LOC110259480	lncRNA	2.53984	0.000116	0.000361
110000000	LOC110259983	lncRNA	2.55184	8.39e-10	4.17e-09
110000000	LOC110255702	lncRNA	2.71672	0.00264	0.006629
102000000	LOC102162837	lncRNA	2.82363	0.024378	0.049546
107000000	LOC106508485	lncRNA	2.82363	0.024378	0.049546
102000000	LOC102159243	lncRNA	2.82363	0.024378	0.049546
110000000	LOC110260145	lncRNA	2.92317	0.000799	0.002194
BGIG9823_27134	BGIG9823_27134	lncRNA	2.96114	0.015621	0.033298
110000000	LOC110260626	lncRNA	3.01628	6.6e-07	2.61e-06
110000000	LOC110261533	lncRNA	3.01628	1.66e-05	5.74e-05
110000000	LOC110261768	lncRNA	3.01628	0.012907	0.028106
102000000	LOC102157703	lncRNA	3.01628	0.012907	0.028106
107000000	LOC106505407	lncRNA	3.01628	0.012907	0.028106
102000000	LOC102162074	lncRNA	3.01628	0.012907	0.028106
102000000	LOC102158335	lncRNA	3.10374	0.000239	0.000715
110000000	LOC110257027	lncRNA	3.10374	0.000239	0.000715
BGIG9823_27384	BGIG9823_27384	lncRNA	3.17656	0.007099	0.016401
107000000	LOC106507613	lncRNA	3.18621	0.006833	0.01583
110000000	LOC110256796	lncRNA	3.18621	0.006833	0.01583
BGIG9823_26890	BGIG9823_26890	lncRNA	3.24972	1.09e-135	4.42e-134
110000000	LOC110258647	lncRNA	3.30716	9.53e-170	4.6e-168
110000000	LOC110256392	lncRNA	3.33821	0.003619	0.008822
110000000	LOC110256781	lncRNA	3.47571	0.001919	0.004943
110000000	LOC110259369	lncRNA	3.47571	0.001919	0.004943
BGIG9823_26748	BGIG9823_26748	lncRNA	3.52097	0	0
110000000	LOC110258339	lncRNA	3.53391	2.5e-207	1.48e-205
110000000	LOC110257307	lncRNA	3.53615	1.68e-39	2.39e-38
110000000	LOC110257533	lncRNA	3.56327	0.004602	0.011011
110000000	LOC110255860	lncRNA	3.60124	0.001019	0.002755
107000000	LOC106510320	lncRNA	3.60124	0.02018	0.041762
107000000	LOC106507453	lncRNA	3.60124	0.02018	0.041762
102000000	LOC102159513	lncRNA	3.71672	0.000542	0.001533
BGIG9823_26604	BGIG9823_26604	lncRNA	3.71672	0.000542	0.001533
107000000	LOC106507457	lncRNA	3.82363	0.010367	0.02302
107000000	LOC106509839	lncRNA	3.82363	0.010367	0.02302
110000000	LOC110262126	lncRNA	3.82363	0.010367	0.02302
BGIG9823_27146	BGIG9823_27146	lncRNA	3.82363	0.010367	0.02302
BGIG9823_27170	BGIG9823_27170	lncRNA	3.85018	0.009513	0.021336
BGIG9823_26848	BGIG9823_26848	lncRNA	3.88683	3e-204	1.74e-202
BGIG9823_27056	BGIG9823_27056	lncRNA	3.92317	0.000154	0.000474
110000000	LOC110258356	lncRNA	3.96963	3.17e-180	1.61e-178
110000000	LOC110258383	lncRNA	3.98713	0.000101	0.000317
102000000	LOC102163655	lncRNA	4.01628	0.005371	0.012689
BGIG9823_27042	BGIG9823_27042	lncRNA	4.01628	0.005371	0.012689
110000000	LOC110261648	lncRNA	4.09012	0	0
107000000	LOC106506243	lncRNA	4.18621	0.002804	0.007009
110000000	LOC110262045	lncRNA	4.18621	0.002804	0.007009
102000000	LOC102163738	lncRNA	4.35272	0	0
107000000	LOC106504559	lncRNA	4.44393	0	0
110000000	LOC110259479	lncRNA	4.47571	0.000781	0.002149
107000000	LOC106505345	lncRNA	4.71672	0.000223	0.000671
107000000	LOC106504496	lncRNA	4.71672	0.000223	0.000671
102000000	LOC102167506	lncRNA	4.77117	9.79e-08	4.16e-07
110000000	LOC110261093	lncRNA	4.8928	1.81e-110	6.13e-109
110000000	LOC110259015	lncRNA	5.28382	5.06e-06	1.85e-05
107000000	LOC106508361	lncRNA	5.50813	2.7e-12	1.56e-11
110000000	LOC110259141	lncRNA	6.37805	2.8e-11	1.52e-10
110000000	LOC110260363	lncRNA	6.51325	3.43e-12	1.96e-11
novel-ssc-miR306-5p	novel-ssc-miR306-5p	miRNA	-10.1344	4.88164e-23	4.713e-22
novel-ssc-miR1261-3p	novel-ssc-miR1261-3p	miRNA	-7.82655	3.39715e-06	1.78015e-05
novel-ssc-miR45-3p	novel-ssc-miR45-3p	miRNA	-6.22882	0.0136432	0.0449973
novel-ssc-miR450-3p	novel-ssc-miR450-3p	miRNA	-3.54057	0.00161412	0.00628679
novel-ssc-miR22-5p	novel-ssc-miR22-5p	miRNA	-3.47393	0.00982296	0.0331525
novel-ssc-miR268-5p	novel-ssc-miR268-5p	miRNA	-3.44626	0.00537817	0.0189545
novel-ssc-miR67-3p	novel-ssc-miR67-3p	miRNA	-2.86427	5.82157e-16	4.66018e-15
novel-ssc-miR823-3p	novel-ssc-miR823-3p	miRNA	-2.8618	0.0018767	0.00720381
ssc-miR-299	ssc-miR-299	miRNA	-2.44294	1.72384e-06	9.2773e-06
novel-ssc-miR111-3p	novel-ssc-miR111-3p	miRNA	-2.43357	3.74937e-06	1.95828e-05
novel-ssc-miR32-3p	novel-ssc-miR32-3p	miRNA	-2.06333	6.26272e-09	3.89707e-08
novel-ssc-miR299-3p	novel-ssc-miR299-3p	miRNA	-2.05889	0.000236315	0.00102575
novel-ssc-miR752-5p	novel-ssc-miR752-5p	miRNA	-2.02427	2.73455e-09	1.72179e-08
novel-ssc-miR272-3p	novel-ssc-miR272-3p	miRNA	-2	0.00373341	0.0135474
novel-ssc-miR668-5p	novel-ssc-miR668-5p	miRNA	-1.98832	0.00236728	0.00887313
novel-ssc-miR676-5p	novel-ssc-miR676-5p	miRNA	-1.9823	0.0153035	0.0499558
novel-ssc-miR1421-3p	novel-ssc-miR1421-3p	miRNA	-1.9491	6.76464e-09	4.19303e-08
novel-ssc-miR592-5p	novel-ssc-miR592-5p	miRNA	-1.84868	0.000153702	0.000687773
novel-ssc-miR363-3p	novel-ssc-miR363-3p	miRNA	-1.81191	6.01695e-30	6.65625e-29
novel-ssc-miR1269-5p	novel-ssc-miR1269-5p	miRNA	-1.75055	8.91142e-05	0.000410286
ssc-miR-7857-3p	ssc-miR-7857-3p	miRNA	-1.74519	0.000873516	0.00359564
novel-ssc-miR1412-3p	novel-ssc-miR1412-3p	miRNA	-1.67721	1.31067e-28	1.41075e-27
novel-ssc-miR544-3p	novel-ssc-miR544-3p	miRNA	-1.66838	0.00524234	0.0185167
novel-ssc-miR154-5p	novel-ssc-miR154-5p	miRNA	-1.58247	0.000192032	0.000847387
novel-ssc-miR811-3p	novel-ssc-miR811-3p	miRNA	-1.53481	1.15903e-08	6.99367e-08
novel-ssc-miR287-3p	novel-ssc-miR287-3p	miRNA	-1.5325	0.00154051	0.00601479
novel-ssc-miR1059-3p	novel-ssc-miR1059-3p	miRNA	-1.52558	0.00363508	0.0133426
novel-ssc-miR53-3p	novel-ssc-miR53-3p	miRNA	-1.48294	0.0129781	0.0428925
novel-ssc-miR45-5p	novel-ssc-miR45-5p	miRNA	-1.42781	9.80047e-08	5.65658e-07
novel-ssc-miR313-5p	novel-ssc-miR313-5p	miRNA	-1.33798	8.25994e-11	5.62312e-10
novel-ssc-miR57-5p	novel-ssc-miR57-5p	miRNA	-1.32919	1.66402e-06	9.01627e-06
novel-ssc-miR946-3p	novel-ssc-miR946-3p	miRNA	-1.32654	2.36127e-11	1.64979e-10
novel-ssc-miR1296-5p	novel-ssc-miR1296-5p	miRNA	-1.3198	0.000160438	0.000715903
novel-ssc-miR876-5p	novel-ssc-miR876-5p	miRNA	-1.29331	0.00125345	0.00500437
novel-ssc-miR769-5p	novel-ssc-miR769-5p	miRNA	-1.27589	0.00959634	0.0324564
novel-ssc-miR1019-5p	novel-ssc-miR1019-5p	miRNA	-1.26404	0.00110466	0.00448908
novel-ssc-miR987-3p	novel-ssc-miR987-3p	miRNA	-1.24844	0.000697736	0.00290207
novel-ssc-miR1431-3p	novel-ssc-miR1431-3p	miRNA	-1.2473	7.71763e-18	6.53946e-17
novel-ssc-miR204-5p	novel-ssc-miR204-5p	miRNA	-1.24306	2.79142e-49	4.23498e-48
novel-ssc-miR130-3p	novel-ssc-miR130-3p	miRNA	-1.19358	0.000661537	0.00275871
novel-ssc-miR251-3p	novel-ssc-miR251-3p	miRNA	-1.16326	0.00712508	0.0246745
novel-ssc-miR1022-3p	novel-ssc-miR1022-3p	miRNA	-1.15931	1.14491e-11	8.10593e-11
novel-ssc-miR851-5p	novel-ssc-miR851-5p	miRNA	-1.1534	0.00117739	0.00473632
novel-ssc-miR299-5p	novel-ssc-miR299-5p	miRNA	-1.14916	7.27922e-178	2.27369e-176
ssc-miR-10390	ssc-miR-10390	miRNA	-1.14762	4.67568e-28	4.90023e-27
ssc-miR-124a	ssc-miR-124a	miRNA	-1.13553	5.14673e-06	2.67933e-05
novel-ssc-miR827-3p	novel-ssc-miR827-3p	miRNA	-1.0983	5.74475e-33	6.88074e-32
novel-ssc-miR583-3p	novel-ssc-miR583-3p	miRNA	-1.07131	3.40947e-16	2.77106e-15
novel-ssc-miR223-5p	novel-ssc-miR223-5p	miRNA	-1.05984	0.00116901	0.00472649
novel-ssc-miR554-5p	novel-ssc-miR554-5p	miRNA	-1.05226	0.0112909	0.03755
novel-ssc-miR1406-3p	novel-ssc-miR1406-3p	miRNA	-1.05134	4.07034e-35	4.98773e-34
ssc-miR-205	ssc-miR-205	miRNA	-1.04871	2.5135e-18	2.17609e-17
novel-ssc-miR373-3p	novel-ssc-miR373-3p	miRNA	-1.04411	1.79182e-31	2.0988e-30
ssc-miR-135	ssc-miR-135	miRNA	-1.02852	8.0487e-15	6.16422e-14
ssc-miR-487b	ssc-miR-487b	miRNA	-1.02748	0.0112879	0.0376185
novel-ssc-miR598-5p	novel-ssc-miR598-5p	miRNA	-1.02122	0.00846103	0.0288
novel-ssc-miR1355-5p	novel-ssc-miR1355-5p	miRNA	-1.01669	2.62487e-29	2.8445e-28
novel-ssc-miR1008-3p	novel-ssc-miR1008-3p	miRNA	-1.00393	0.00061496	0.00258137
novel-ssc-miR1301-3p	novel-ssc-miR1301-3p	miRNA	1.01788	5.9803e-11	4.08868e-10
ssc-miR-129a-3p	ssc-miR-129a-3p	miRNA	1.0239	1.90941e-05	9.59523e-05
novel-ssc-miR944-5p	novel-ssc-miR944-5p	miRNA	1.05373	7.96912e-09	4.88262e-08
novel-ssc-miR29-3p	novel-ssc-miR29-3p	miRNA	1.09586	0.0068415	0.0238479
novel-ssc-miR1064-5p	novel-ssc-miR1064-5p	miRNA	1.11283	1.25597e-69	2.41055e-68
ssc-miR-223	ssc-miR-223	miRNA	1.14269	5.91429e-260	2.54634e-258
novel-ssc-miR1392-5p	novel-ssc-miR1392-5p	miRNA	1.17146	1.32167e-05	6.76986e-05
novel-ssc-miR628-5p	novel-ssc-miR628-5p	miRNA	1.1743	0.000952041	0.00389872
novel-ssc-miR1114-3p	novel-ssc-miR1114-3p	miRNA	1.18008	0.000792841	0.00327201
ssc-miR-216	ssc-miR-216	miRNA	1.20769	2.07543e-10	1.40091e-09
novel-ssc-miR939-5p	novel-ssc-miR939-5p	miRNA	1.22711	2.08415e-06	1.11039e-05
novel-ssc-miR1120-5p	novel-ssc-miR1120-5p	miRNA	1.22817	0.000222769	0.00097225
novel-ssc-miR203-5p	novel-ssc-miR203-5p	miRNA	1.23306	8.23378e-10	5.33188e-09
novel-ssc-miR350-5p	novel-ssc-miR350-5p	miRNA	1.27898	0.0141989	0.0466369
novel-ssc-miR480-3p	novel-ssc-miR480-3p	miRNA	1.28073	4.33435e-30	4.86241e-29
ssc-miR-31	ssc-miR-31	miRNA	1.32512	2.23144e-24	2.18079e-23
ssc-miR-7137-3p	ssc-miR-7137-3p	miRNA	1.33142	9.47649e-99	2.28728e-97
ssc-miR-411	ssc-miR-411	miRNA	1.33258	2.64447e-06	1.39955e-05
novel-ssc-miR465-3p	novel-ssc-miR465-3p	miRNA	1.34294	2.73317e-53	4.35394e-52
novel-ssc-miR1285-3p	novel-ssc-miR1285-3p	miRNA	1.3455	2.74439e-44	3.76881e-43
novel-ssc-miR1416-5p	novel-ssc-miR1416-5p	miRNA	1.35025	6.8575e-30	7.53379e-29
novel-ssc-miR635-5p	novel-ssc-miR635-5p	miRNA	1.3837	1.81168e-13	1.33611e-12
novel-ssc-miR563-3p	novel-ssc-miR563-3p	miRNA	1.403	4.50967e-08	2.64114e-07
novel-ssc-miR573-5p	novel-ssc-miR573-5p	miRNA	1.43986	6.64343e-13	4.85458e-12
novel-ssc-miR1013-3p	novel-ssc-miR1013-3p	miRNA	1.44189	5.06893e-18	4.34129e-17
novel-ssc-miR1395-5p	novel-ssc-miR1395-5p	miRNA	1.44236	0.0045272	0.0162429
novel-ssc-miR24-5p	novel-ssc-miR24-5p	miRNA	1.45072	0	0
novel-ssc-miR1319-3p	novel-ssc-miR1319-3p	miRNA	1.46396	3.76775e-56	6.18765e-55
novel-ssc-miR1399-3p	novel-ssc-miR1399-3p	miRNA	1.48188	1.1466e-63	2.05229e-62
novel-ssc-miR1091-5p	novel-ssc-miR1091-5p	miRNA	1.50328	0.000747758	0.00310203
novel-ssc-miR324-3p	novel-ssc-miR324-3p	miRNA	1.54504	0	0
novel-ssc-miR1182-3p	novel-ssc-miR1182-3p	miRNA	1.55078	6.30862e-22	5.91155e-21
novel-ssc-miR753-5p	novel-ssc-miR753-5p	miRNA	1.56892	1.24476e-33	1.51366e-32
novel-ssc-miR729-3p	novel-ssc-miR729-3p	miRNA	1.63566	8.60848e-17	7.14235e-16
novel-ssc-miR802-3p	novel-ssc-miR802-3p	miRNA	1.67319	6.58745e-31	7.5495e-30
novel-ssc-miR1045-3p	novel-ssc-miR1045-3p	miRNA	1.68068	3.57716e-12	2.56685e-11
novel-ssc-miR1215-3p	novel-ssc-miR1215-3p	miRNA	1.72559	5.8958e-06	3.04936e-05
novel-ssc-miR1278-5p	novel-ssc-miR1278-5p	miRNA	1.72984	1.31544e-06	7.15184e-06
ssc-miR-370	ssc-miR-370	miRNA	1.7299	1.13156e-124	3.16242e-123
novel-ssc-miR652-5p	novel-ssc-miR652-5p	miRNA	1.73324	2.14736e-08	1.26694e-07
novel-ssc-miR282-3p	novel-ssc-miR282-3p	miRNA	1.77438	6.78466e-16	5.37709e-15
novel-ssc-miR804-3p	novel-ssc-miR804-3p	miRNA	1.77526	0	0
novel-ssc-miR487-3p	novel-ssc-miR487-3p	miRNA	1.78873	1.80128e-281	8.43952e-280
novel-ssc-miR570-5p	novel-ssc-miR570-5p	miRNA	1.80694	3.93632e-20	3.56281e-19
novel-ssc-miR882-3p	novel-ssc-miR882-3p	miRNA	1.82564	1.31181e-38	1.71287e-37
novel-ssc-miR1006-3p	novel-ssc-miR1006-3p	miRNA	1.82935	8.79415e-09	5.34697e-08
novel-ssc-miR1150-5p	novel-ssc-miR1150-5p	miRNA	1.84003	3.88225e-17	3.25496e-16
novel-ssc-miR383-5p	novel-ssc-miR383-5p	miRNA	1.89413	0.0028123	0.0104186
novel-ssc-miR317-5p	novel-ssc-miR317-5p	miRNA	1.97944	0.000956587	0.00390729
novel-ssc-miR1122-5p	novel-ssc-miR1122-5p	miRNA	1.98682	4.95326e-117	1.33738e-115
novel-ssc-miR429-5p	novel-ssc-miR429-5p	miRNA	1.9937	9.682e-113	2.57057e-111
novel-ssc-miR339-3p	novel-ssc-miR339-3p	miRNA	2.00007	1.69253e-277	7.48946e-276
novel-ssc-miR832-3p	novel-ssc-miR832-3p	miRNA	2.02562	4.34328e-16	3.49437e-15
ssc-miR-493-3p	ssc-miR-493-3p	miRNA	2.04761	3.09422e-111	7.95014e-110
novel-ssc-miR854-3p	novel-ssc-miR854-3p	miRNA	2.05485	1.91847e-32	2.28069e-31
novel-ssc-miR1079-3p	novel-ssc-miR1079-3p	miRNA	2.05498	2.56295e-24	2.4895e-23
novel-ssc-miR1287-5p	novel-ssc-miR1287-5p	miRNA	2.07325	4.36884e-28	4.60898e-27
novel-ssc-miR355-5p	novel-ssc-miR355-5p	miRNA	2.08646	2.40944e-40	3.19853e-39
novel-ssc-miR359-5p	novel-ssc-miR359-5p	miRNA	2.10935	3.69408e-220	1.33743e-218
novel-ssc-miR700-3p	novel-ssc-miR700-3p	miRNA	2.12495	1.11404e-38	1.46667e-37
novel-ssc-miR1250-5p	novel-ssc-miR1250-5p	miRNA	2.17122	9.7532e-77	2.07158e-75
novel-ssc-miR548-3p	novel-ssc-miR548-3p	miRNA	2.19018	2.20373e-18	1.91833e-17
novel-ssc-miR1238-3p	novel-ssc-miR1238-3p	miRNA	2.20632	2.13923e-13	1.57041e-12
novel-ssc-miR392-5p	novel-ssc-miR392-5p	miRNA	2.25741	7.34991e-36	9.21922e-35
novel-ssc-miR381-3p	novel-ssc-miR381-3p	miRNA	2.28011	0.0110002	0.0368138
novel-ssc-miR1231-3p	novel-ssc-miR1231-3p	miRNA	2.28905	0	0
novel-ssc-miR983-5p	novel-ssc-miR983-5p	miRNA	2.34852	0.000180727	0.000799717
novel-ssc-miR234-5p	novel-ssc-miR234-5p	miRNA	2.38024	3.06924e-61	5.25732e-60
novel-ssc-miR454-5p	novel-ssc-miR454-5p	miRNA	2.43328	1.19985e-258	5.02991e-257
novel-ssc-miR778-5p	novel-ssc-miR778-5p	miRNA	2.48067	3.25404e-14	2.44513e-13
novel-ssc-miR277-3p	novel-ssc-miR277-3p	miRNA	2.52715	5.52118e-242	2.19881e-240
ssc-miR-132	ssc-miR-132	miRNA	2.52793	4.71524e-10	3.10388e-09
novel-ssc-miR821-5p	novel-ssc-miR821-5p	miRNA	2.56242	1.69701e-05	8.60934e-05
novel-ssc-miR632-3p	novel-ssc-miR632-3p	miRNA	2.58026	4.86447e-49	7.31047e-48
novel-ssc-miR1323-3p	novel-ssc-miR1323-3p	miRNA	2.58322	3.37527e-100	8.272e-99
novel-ssc-miR599-3p	novel-ssc-miR599-3p	miRNA	2.58358	1.33459e-19	1.20113e-18
novel-ssc-miR1429-5p	novel-ssc-miR1429-5p	miRNA	2.65518	4.22903e-47	6.18059e-46
novel-ssc-miR190-3p	novel-ssc-miR190-3p	miRNA	2.70302	4.02717e-16	3.25649e-15
novel-ssc-miR167-3p	novel-ssc-miR167-3p	miRNA	2.80376	3.31767e-305	1.60153e-303
ssc-miR-4332	ssc-miR-4332	miRNA	2.81249	2.81718e-110	7.12344e-109
novel-ssc-miR1004-5p	novel-ssc-miR1004-5p	miRNA	2.82655	2.67676e-05	0.0001308
novel-ssc-miR229-5p	novel-ssc-miR229-5p	miRNA	2.86345	0	0
novel-ssc-miR7-3p	novel-ssc-miR7-3p	miRNA	2.87557	5.13506e-67	9.6237e-66
novel-ssc-miR119-5p	novel-ssc-miR119-5p	miRNA	2.94996	0.00984167	0.0331104
novel-ssc-miR488-3p	novel-ssc-miR488-3p	miRNA	2.94996	0.00984167	0.0331104
novel-ssc-miR70-5p	novel-ssc-miR70-5p	miRNA	2.96683	0.00261103	0.00974091
ssc-miR-376a-5p	ssc-miR-376a-5p	miRNA	3.15528	0.00506595	0.0179734
novel-ssc-miR1433-5p	novel-ssc-miR1433-5p	miRNA	3.19265	7.37746e-05	0.000344642
novel-ssc-miR1204-3p	novel-ssc-miR1204-3p	miRNA	3.23786	1.68566e-11	1.18293e-10
novel-ssc-miR1298-5p	novel-ssc-miR1298-5p	miRNA	3.38187	1.50587e-08	8.95096e-08
novel-ssc-miR1207-5p	novel-ssc-miR1207-5p	miRNA	3.39232	1.0153e-18	9.03564e-18
novel-ssc-miR1432-5p	novel-ssc-miR1432-5p	miRNA	3.89812	5.39295e-09	3.38227e-08
novel-ssc-miR913-3p	novel-ssc-miR913-3p	miRNA	6.16993	0.00826878	0.0282968
novel-ssc-miR927-5p	novel-ssc-miR927-5p	miRNA	6.18982	0.00826878	0.0282968
novel-ssc-miR1176-5p	novel-ssc-miR1176-5p	miRNA	6.37504	0.00418142	0.0150701
novel-ssc-miR158-3p	novel-ssc-miR158-3p	miRNA	6.55459	0.00213275	0.00805086
novel-ssc-miR1379-5p	novel-ssc-miR1379-5p	miRNA	6.75822	0	0
novel-ssc-miR421-5p	novel-ssc-miR421-5p	miRNA	7.09803	8.20931e-05	0.000381266
novel-ssc-miR1379-3p	novel-ssc-miR1379-3p	miRNA	7.70044	1.99208e-06	1.06848e-05
novel-ssc-miR741-3p	novel-ssc-miR741-3p	miRNA	7.7211	1.08971e-06	5.98588e-06

## Sheet: Table S6
Supplementary Table S6 Top 20 GO terms of GO enrichment analysis for differentially expression mRNAs
GO Term ID	GO Term Description	GO Term Level2	Candidate Gene1	P value	Q value
GO:0006629	lipid metabolic process	metabolic process	28(18/10)	1.44e-11	1.6e-08
GO:0045893	positive regulation of transcription, DNA-templated	metabolic process	33(24/9)	4.36e-07	9.72e-05
GO:0006954	inflammatory response	response to stimulus	35(25/10)	3.79e-06	0.000528
GO:0016042	lipid catabolic process	metabolic process	28(14/14)	1.47e-05	0.001486
GO:0070098	chemokine-mediated signaling pathway	regulation of biological process	47(31/16)	1.41e-05	0.001486
GO:0001503	ossification	multicellular organismal process	54(36/18)	2.81e-05	0.00214
GO:0071222	cellular response to lipopolysaccharide	response to stimulus	45(24/21)	3.27e-05	0.00214
GO:0046395	carboxylic acid catabolic process	cellular process	2(1/1)	4.32e-05	0.002533
GO:0045444	fat cell differentiation	developmental process	37(5/32)	8.01e-05	0.004057
GO:0002408	myeloid dendritic cell chemotaxis	immune system process	3(1/2)	0.000129	0.005134
GO:0060749	mammary gland alveolus development	developmental process	15(7/8)	0.00012	0.005134
GO:0045600	positive regulation of fat cell differentiation	regulation of biological process	43(42/1)	0.000182	0.007007
GO:0001676	long-chain fatty acid metabolic process	metabolic process	18(10/8)	0.000213	0.007646
GO:0006651	diacylglycerol biosynthetic process	metabolic process	4(2/2)	0.000257	0.0078
GO:0097756	negative regulation of blood vessel diameter	multicellular organismal process	4(2/2)	0.000257	0.0078
GO:0019439	aromatic compound catabolic process	metabolic process	5(4/1)	0.000426	0.011876
GO:0002690	positive regulation of leukocyte chemotaxis	regulation of biological process	6(5/1)	0.000637	0.016125
GO:0000122	negative regulation of transcription by RNA polymerase II	metabolic process	27(14/13)	0.00079	0.019564
GO:0002523	leukocyte migration involved in inflammatory response	locomotion	7(5/2)	0.000888	0.01978
GO:0071320	cellular response to cAMP	response to stimulus	30(24/6)	0.000999	0.021827
The bold text represented the GO terms which associated with lipid related biology process; 1:The numbers represented: total genes in GO terms (DE mRNA enriched in GO term/remaining genes);

## Sheet: Table S7
Supplementary Table S7 Top 20 terms of KEGG enrichment analysis for differentially expression mRNAs
ID	Pathway Term Description	Num	bg_num1	P value	Q value	Class
ko03320	PPAR signaling pathway	13	85	1.97e-09	4.3e-07	Organismal Systems
ko04152	AMPK signaling pathway	12	128	2.06e-06	0.000224	Environmental Information Processing
ko04060	Cytokine-cytokine receptor interaction	16	297	5.49e-05	0.00399	Environmental Information Processing
ko04380	Osteoclast differentiation	10	129	7.86e-05	0.00428	Organismal Systems
ko04550	Signaling pathways regulating pluripotency of stem cells	10	139	0.000147	0.00637	Cellular Processes
ko04930	Type II diabetes mellitus	6	49	0.000189	0.00637	Human Diseases
ko01212	Fatty acid metabolism	6	51	0.000237	0.00637	Metabolism
ko04917	Prolactin signaling pathway	7	73	0.000262	0.00637	Organismal Systems
ko05225	Hepatocellular carcinoma	11	178	0.000263	0.00637	Human Diseases
ko04913	Ovarian Steroidogenesis	6	57	0.000439	0.00913	Organismal Systems
ko01524	Platinum drug resistance	7	80	0.000461	0.00913	Human Diseases
ko04062	Chemokine signaling pathway	11	193	0.000526	0.00956	Organismal Systems
ko04068	FoxO signaling pathway	9	137	0.000619	0.0104	Environmental Information Processing
ko04910	Insulin signaling pathway	9	144	0.000887	0.0134	Organismal Systems
ko05210	Colorectal cancer	7	90	0.000938	0.0134	Human Diseases
ko05205	Proteoglycans in cancer	11	208	0.00098	0.0134	Human Diseases
ko05166	HTLV-I infection	13	280	0.001155	0.0139	Human Diseases
ko05224	Breast cancer	9	150	0.001185	0.0139	Human Diseases
ko04657	IL-17 signaling pathway	7	94	0.001214	0.0139	Organismal Systems
ko05202	Transcriptional mis regulation in cancers	10	184	0.001357	0.0141	Human Diseases
The bold text represented the GO terms which associated with lipid related biology process; 1:The numbers represented total genes in GO terms;

## Sheet: Table S8
Supplementary Table S8 Summary of 116 overlapped genes between DE mRNAs and target genes of ncRNAs(miRNAs/lncRNAs)
DE RNA ID	RNA Symbol	RNA Type	log2(Fold Change)	P value	Q value
ENSSSCG00000003018	LIPE	mRNA	-1.05195	0	0
ENSSSCG00000005385	NR4A3	mRNA	1.42812	0	0
ENSSSCG00000009216	SPP1	mRNA	6.2302	0	0
ENSSSCG00000010219	ARID5B	mRNA	1.16854	0	0
ENSSSCG00000010461	ANKRD1	mRNA	2.77377	0	0
ENSSSCG00000011133	PFKFB3	mRNA	1.05774	0	0
ENSSSCG00000012880	CPT1A	mRNA	1.15268	0	0
ENSSSCG00000032282	ACP5	mRNA	5.86341	0	0
ENSSSCG00000035037	SIK1	mRNA	1.26661	0	0
ENSSSCG00000036135	COL1A1	mRNA	2.19735	0	0
ENSSSCG00000036883	FABP3	mRNA	-1.04627	0	0
ENSSSCG00000037066	GADD45A	mRNA	2.0613	0	0
ENSSSCG00000015871	NR4A2	mRNA	1.00335	2.65e-288	2.13e-286
ENSSSCG00000013599	ANGPTL4	mRNA	-1.19938	2.97e-283	2.34e-281
ENSSSCG00000027855	SOCS1	mRNA	3.51695	3.61e-254	2.54e-252
ENSSSCG00000016225	MOGAT1	mRNA	-1.04276	8.27e-242	5.52e-240
ENSSSCG00000005494	TNC	mRNA	2.14313	3.61e-231	2.33e-229
ENSSSCG00000035101	KLF5	mRNA	1.93498	1.31e-168	6.3e-167
ENSSSCG00000035774	ERRFI1	mRNA	1.07537	1.62e-159	7.48e-158
ENSSSCG00000029879	LTF	mRNA	2.64754	4.23e-159	1.95e-157
ENSSSCG00000017637	MPO	mRNA	4.46436	4.27e-143	1.84e-141
ENSSSCG00000002764	SMPD3	mRNA	4.82118	7.63e-137	3.12e-135
ENSSSCG00000003145	FUT2	mRNA	1.67197	7.46e-126	2.86e-124
NO_INFO	PLCD4	mRNA	-1.8995	3.22e-106	1.06e-104
ENSSSCG00000037241	RGS2	mRNA	1.42608	1.7e-103	5.45e-102
ENSSSCG00000024312	ID4	mRNA	2.26867	8.71e-102	2.72e-100
ENSSSCG00000040080	PTGDS	mRNA	2.08634	2.49e-100	7.67e-99
ENSSSCG00000025698	SERPINE1	mRNA	1.28161	1.33e-92	3.86e-91
NO_INFO	RDH16	mRNA	1.22639	8.05e-85	2.16e-83
ENSSSCG00000030998	WIF1	mRNA	6.4798	2.03e-84	5.42e-83
ENSSSCG00000006588	S100A9	mRNA	3.70278	3.09e-84	8.23e-83
NO_INFO	MYC	mRNA	1.07363	3.57e-80	9.11e-79
ENSSSCG00000004233	SMPDL3A	mRNA	-1.05735	1.29e-75	3.15e-74
ENSSSCG00000031736	MGST2	mRNA	-1.07394	3.89e-72	9.2e-71
ENSSSCG00000040513	AQP3	mRNA	1.12351	1.1e-64	2.38e-63
ENSSSCG00000006590	S100A8	mRNA	3.76142	1.67e-61	3.45e-60
ENSSSCG00000017923	ALOX15	mRNA	3.34271	4.05e-61	8.25e-60
ENSSSCG00000012160	SH3KBP1	mRNA	1.11565	5.24e-56	9.96e-55
ENSSSCG00000029515	PON3	mRNA	1.36844	4.34e-55	8.1e-54
ENSSSCG00000012967	FOSL1	mRNA	4.39875	3.51e-34	4.51e-33
ENSSSCG00000025578	ALDH1A2	mRNA	-1.57881	5.26e-34	6.73e-33
ENSSSCG00000029990	DEFB1	mRNA	1.68752	1.86e-33	2.36e-32
ENSSSCG00000020864	VDR	mRNA	2.13176	1.56e-25	1.57e-24
ENSSSCG00000017358	SLC4A1	mRNA	1.23798	6.95e-23	6.44e-22
NO_INFO	CNGB1	mRNA	1.536	3.07e-22	2.78e-21
ENSSSCG00000008645	ID2	mRNA	1.02509	7.5e-21	6.43e-20
ENSSSCG00000012167	PHEX	mRNA	1.22064	8.52e-21	7.29e-20
ENSSSCG00000034942	STAR	mRNA	-1.98372	2.86e-20	2.41e-19
ENSSSCG00000037292	PLA2G4E	mRNA	1.24563	1.26e-17	9.57e-17
ENSSSCG00000004646	ATP8B4	mRNA	2.06837	3.29e-17	2.46e-16
ENSSSCG00000023090	BEST1	mRNA	2.45685	3.67e-17	2.73e-16
ENSSSCG00000017466	CCR7	mRNA	3.15014	1.55e-15	1.07e-14
ENSSSCG00000032613	SNAI1	mRNA	1.03315	3.42e-15	2.32e-14
ENSSSCG00000003395	PIK3CD	mRNA	1.01162	2.22e-13	1.37e-12
ENSSSCG00000005902	FOXH1	mRNA	2.88105	1.27e-12	7.46e-12
ENSSSCG00000032474	CXCL10	mRNA	1.47118	1.59e-12	9.3e-12
ENSSSCG00000028671	CEL	mRNA	1.8565	3.19e-12	1.83e-11
ENSSSCG00000000257	ITGB7	mRNA	1.08201	4.23e-12	2.41e-11
NO_INFO	PRCD	mRNA	-1.04673	6.68e-11	3.55e-10
ENSSSCG00000015037	IL18	mRNA	1.25314	7.92e-11	4.19e-10
ENSSSCG00000007507	PCK1	mRNA	1.71672	1.65e-10	8.57e-10
ENSSSCG00000039315	SOX10	mRNA	-1.33479	7.14e-09	3.31e-08
ENSSSCG00000006403	CRP	mRNA	-1.45184	2.35e-08	1.05e-07
ENSSSCG00000008421	LHCGR	mRNA	-2.79107	5.02e-08	2.19e-07
ENSSSCG00000016204	IHH	mRNA	5.66014	1.82e-07	7.58e-07
ENSSSCG00000013575	RETN	mRNA	2.78181	8.51e-07	3.34e-06
ENSSSCG00000027161	PIP5K1B	mRNA	1.00563	1.4e-06	5.4e-06
ENSSSCG00000020837	CEACAM1	mRNA	1.31196	1.5e-06	5.78e-06
ENSSSCG00000009429	TNFSF11	mRNA	5.33821	3.28e-06	1.22e-05
ENSSSCG00000012536	PLP1	mRNA	-1.18535	6.04e-06	2.19e-05
ENSSSCG00000017313	CRHR1	mRNA	2.82363	6.72e-06	2.43e-05
ENSSSCG00000040288	ARNT2	mRNA	1.00155	1.09e-05	3.84e-05
ENSSSCG00000002033	CEBPE	mRNA	-1.05411	1.09e-05	3.86e-05
ENSSSCG00000001045	ELOVL2	mRNA	-2.06172	1.39e-05	4.84e-05
ENSSSCG00000006902	GFI1	mRNA	1.50171	2.06e-05	7.06e-05
ENSSSCG00000029061	BMP3	mRNA	2.71672	2.12e-05	7.23e-05
ENSSSCG00000014272	ACSL6	mRNA	1.01799	2.43e-05	8.26e-05
ENSSSCG00000022405	P2RX1	mRNA	1.84225	3.97e-05	0.000131
ENSSSCG00000004167	MYB	mRNA	2.2893	4.6e-05	0.000151
NO_INFO	PCARE	mRNA	-1.01409	4.63e-05	0.000152
ENSSSCG00000016673	GHRHR	mRNA	-2.08326	0.000102	0.000319
NO_INFO	SSTR2	mRNA	4.82364	0.00012	0.000375
ENSSSCG00000021873	CRABP1	mRNA	1.41221	0.000122	0.000379
ENSSSCG00000010966	CCL19	mRNA	-1.16592	0.000348	0.001017
ENSSSCG00000000647	OLR1	mRNA	1.14873	0.000477	0.001361
ENSSSCG00000000182	WNT10B	mRNA	1.1862	0.000486	0.001385
ENSSSCG00000006764	PTPN22	mRNA	1.35508	0.000553	0.001562
ENSSSCG00000000978	MLC1	mRNA	1.23867	0.000585	0.001643
ENSSSCG00000033993	PLCXD3	mRNA	1.01895	0.000718	0.001986
NO_INFO	WNT1	mRNA	3.60124	0.001019	0.002755
ENSSSCG00000027266	PNPLA3	mRNA	-1.25381	0.001591	0.004163
ENSSSCG00000038677	GJB3	mRNA	-2.39876	0.001971	0.005062
ENSSSCG00000013316	WT1	mRNA	-2.15364	0.002106	0.005385
ENSSSCG00000025993	SGPP2	mRNA	1.10382	0.002195	0.00559
ENSSSCG00000014093	CRHBP	mRNA	2.71672	0.00264	0.006629
ENSSSCG00000037579	PPBP	mRNA	2.11097	0.003003	0.007457
ENSSSCG00000037452	HTR2A	mRNA	1.16828	0.003015	0.007483
ENSSSCG00000017863	TRPV1	mRNA	3.33821	0.003619	0.008822
ENSSSCG00000034429	PLA2G5	mRNA	3.33821	0.003619	0.008822
ENSSSCG00000037735	HCAR2	mRNA	1.75325	0.004453	0.010685
ENSSSCG00000008590	MFSD2B	mRNA	1.08847	0.004991	0.011862
ENSSSCG00000014861	MOGAT2	mRNA	4.01628	0.005371	0.012689
ENSSSCG00000006719	HSD3B1	mRNA	-3.15364	0.007423	0.01708
ENSSSCG00000034943	GDF6	mRNA	-2.0992	0.010135	0.02256
ENSSSCG00000015332	PON1	mRNA	3.82363	0.010367	0.02302
ENSSSCG00000032777	CXCL9	mRNA	1.60124	0.011405	0.025104
ENSSSCG00000025708	GABRA3	mRNA	1.69435	0.013004	0.02826
ENSSSCG00000039270	TREM2	mRNA	-2.98372	0.013914	0.030026
ENSSSCG00000037554	FUT7	mRNA	1.45685	0.015313	0.03274
ENSSSCG00000024233	RAB39B	mRNA	2.33821	0.015369	0.03284
ENSSSCG00000029503	F7	mRNA	2.33821	0.015369	0.03284
ENSSSCG00000006215	CRH	mRNA	-2.30565	0.016857	0.035649
ENSSSCG00000008963	AREG	mRNA	2.82363	0.024378	0.049546
ENSSSCG00000024305	MT3	mRNA	2.82363	0.024378	0.049546
ENSSSCG00000035933	MAPK15	mRNA	2.82363	0.024378	0.049546
ENSSSCG00000037856	EDN2	mRNA	2.82363	0.024378	0.049546

## Sheet: Table S9
Supplementary Table S9 GO and KEGG enrichment analysis for 116 overlapped differentially expression genes
ID	Source	Term ID	Term Name	P(adj)
1	GO: BP	GO:0033993	Response to lipid	2.173×10-28
2	GO: BP	GO:0006629	Lipid metabolic process	2.707×10-23
3	GO: BP	GO:0071396	Cellular response to lipid	9.499×10-18
4	GO: BP	GO:0044255	Cellular lipid metabolic process	6.011×10-16
5	GO: BP	GO:0032496	Response to lipopolysaccharide	5.441×10-10
6	GO: BP	GO:0008610	Lipid biosynthetic process	1.309×10-8
7	KEGG	KEGG:03320	PPAR signaling pathway	1.149×10-2
8	REAC	REAC:R-HAS-556833	Metabolism of lipids	9.666×10-5
9	WP	WP: WP3942	Metabolism of lipids	2.650×10-2
10	WP	WP: WP236	Adipogenesis	1.016×10-4
11	GO: BP	GO:0045444	Fat cell differentiation	2.748×10-8
12	GO: BP	GO:0016042	Lipid catabolic process	9.434×10-8
13	GO: BP	GO:0046486	Glycerolipid metabolic process	3.020×10-6
14	GO: BP	GO:0044242	Cellular lipid catabolic process	3.720×10-6
15	GO: BP	GO:0006796	Phosphate-containing compound metabolic process	4.589×10-6
16	GO: BP	GO:0071385	Cellular response to glucocorticoid stimulus	4.978×10-2

## Sheet: Table S10
Supplementary Table S10 Summary of DE mRNAs and ncRNAs(miRNAs/lncRNAs) in 34 ceRNAs
DE RNA ID	RNA Symbol	RNA Type	log2(Fold Change)	P value	Q value
ENSSSCG00000000978	MLC1	mRNA	1.23867	0.000585	0.001643
ENSSSCG00000007317	DLGAP4	mRNA	1.02346	0	0
ENSSSCG00000012651	XPNPEP2	mRNA	-2.15364	0.000166	0.000508
ENSSSCG00000036883	FABP3	mRNA	-1.04627	0	0
ENSSSCG00000038838	DLX5	mRNA	4.01628	8.25e-05	0.000263
110000000	LOC110258991	lncRNA	-3.60899	0.019063	0.039755
107000000	LOC106507757	lncRNA	-3.23165	8.4e-05	0.000267
102000000	LOC102167686	lncRNA	-2.98372	0.013914	0.030026
110000000	LOC110260601	lncRNA	-2.98372	0.013914	0.030026
110000000	LOC110258316	lncRNA	-2.44315	0.009503	0.021324
101000000	LOC100517320	lncRNA	-2.44315	0.009503	0.021324
110000000	LOC110259507	lncRNA	-1.94308	6.02e-05	0.000195
102000000	LOC102167197	lncRNA	-1.90972	0.003475	0.008504
102000000	LOC102160777	lncRNA	-1.79107	0.01633	0.034663
110000000	LOC110256990	lncRNA	-1.72069	0.005249	0.012421
102000000	LOC102166006	lncRNA	-1.66179	0.014854	0.031868
110000000	LOC110258681	lncRNA	-1.51076	3.64e-06	1.35e-05
107000000	LOC106507293	lncRNA	-1.50398	3.35e-09	1.59e-08
110000000	LOC110258332	lncRNA	-1.36223	2.03e-09	9.82e-09
110000000	LOC110256316	lncRNA	-1.33422	1.73e-07	7.19e-07
110000000	LOC110258138	lncRNA	-1.27659	0.012719	0.027735
107000000	LOC106505119	lncRNA	-1.24281	3.27e-09	1.56e-08
107000000	LOC106510024	lncRNA	-1.18026	3.63e-22	3.28e-21
102000000	LOC102167067	lncRNA	-1.17261	3.5e-21	3.03e-20
110000000	LOC110255724	lncRNA	-1.06618	0.000237	0.000709
102000000	LOC102164789	lncRNA	-1.03817	0.001841	0.00476
102000000	LOC102158075	lncRNA	1.31001	7.7e-06	2.76e-05
107000000	LOC106505566	lncRNA	1.3642	0.005093	0.012081
110000000	LOC110261018	lncRNA	1.39479	0.006048	0.014176
107000000	LOC106507446	lncRNA	1.50503	5.57e-14	3.55e-13
110000000	LOC110261980	lncRNA	1.67925	0.007158	0.016513
110000000	LOC110257112	lncRNA	1.88301	3.45e-86	9.37e-85
110000000	LOC110258326	lncRNA	2.36626	7.47e-09	3.46e-08
110000000	LOC110255632	lncRNA	2.43132	9.17e-06	3.26e-05
110000000	LOC110261577	lncRNA	2.46771	4.18e-21	3.61e-20
107000000	LOC106510320	lncRNA	3.60124	0.02018	0.041762
110000000	LOC110260363	lncRNA	6.51325	3.43e-12	1.96e-11
novel-ssc-miR306-5p	novel-ssc-miR306-5p	miRNA	-10.1344	4.88164e-23	4.713e-22
novel-ssc-miR22-5p	novel-ssc-miR22-5p	miRNA	-3.47393	0.00982296	0.0331525
novel-ssc-miR272-3p	novel-ssc-miR272-3p	miRNA	-2	0.00373341	0.0135474
novel-ssc-miR1421-3p	novel-ssc-miR1421-3p	miRNA	-1.9491	6.76464e-09	4.19303e-08
novel-ssc-miR251-3p	novel-ssc-miR251-3p	miRNA	-1.16326	0.00712508	0.0246745
novel-ssc-miR1114-3p	novel-ssc-miR1114-3p	miRNA	1.18008	0.000792841	0.00327201
novel-ssc-miR1120-5p	novel-ssc-miR1120-5p	miRNA	1.22817	0.000222769	0.00097225
novel-ssc-miR381-3p	novel-ssc-miR381-3p	miRNA	2.28011	0.0110002	0.0368138
novel-ssc-miR1207-5p	novel-ssc-miR1207-5p	miRNA	3.39232	1.0153e-18	9.03564e-18
